# Supplementary material for: Designing combination therapies with modeling chaperoned machine learning
Source: PLoS Comput Biol. 2019 Sep 9;15(9):e1007158. doi: 10.1371/journal.pcbi.1007158 (PMC6733436; doi:10.1371/journal.pcbi.1007158)
Supplement: S2 Data — Data format is described above in ‘SupportingData’. (XLSX) [file pcbi.1007158.s006.xlsx]

## Sheet: p53
60.5828	50.1943	50.2548	38.4108	38.2102	23.7134	25.0446	28.3885	31.5191	24.1561	22.8471	29.8822	25.0191	24.328	25.7994	19.7452	19.7866	27.2197	25.0159	32.4331	24.1656	20.2803	22.9013	21.8121	21.5701	28.5318	30.8885	36.8854	29.6433	35.3312	43.6306	48.4841	44.6083	50.6879	54.586	46.1656	49.7516	52.9076	59.8408	91.758	93.9936	90.7484	85.3694	75.3949	52.0637	44.3567	45.4268	32.1274	37.258	27.5924
7.87898	8.30892	6.17197	4.57962	6.78344	5.24522	2.16879	3.56369	5.91401	10.6815	9.78025	22.7006	26.3153	4.40764	23.8662	4.5	5.30892	6.71975	8.04777	22.7102	16.5892	18.3185	10.4841	13.3503	16.1497	13.2548	18.3822	22.2994	27.1561	51.0032	39.6497	42.9268	36.9586	26.1306	25.9076	23.6815	19.9745	21.949	21.0318	18.0191	16.1592	18.8121	18.6433	20.5605	19.4013	22.3885	25.5096	29.7611	30.8822	36.7389
79.914	62.3599	49.5	49.6306	34.965	32.9427	25.3662	31.1561	30.8631	30.3567	38.035	38.0287	46.0127	39.6783	36.7166	35.7707	40.0924	40.2866	34.7866	38.9554	37.3662	38.2834	34.3503	49.2611	44.5382	52.5541	55.7325	72.242	85.2898	50.9331	68.0541	46.8758	61.5318	43.0669	44.7707	47.8631	39.0605	38.2006	36.1338	28.7452	30.0764	31.9904	40.793	41.2452	50.5223	60.2994	62.7898	59.8408	60.1401	67.7834
192.497	183.99	182.545	184.535	191.153	195.586	202.156	300.742	262.704	256.185	274.061	266.78	202.65	253.669	225.067	227.076	232.299	210.672	201.71	196.229	193.395	190.035	207.968	189.745	186.596	196.229	208.197	205.223	215.385	218.847	209.669	216.615	220.045	220.191	224.111	247.567	219.611	225.742	262.567	203.169	249.003	249.083	234.194	243.522	233.713	224.736	219.764	218.398	207.255	211.971
75.4522	78.4459	75.4554	74.3503	75.1115	68.8949	79.7771	73.5828	56.2038	72.3471	77.8248	77.121	80.5382	80.2771	76.4268	58.6401	77.5032	90.4968	93.4108	81.6847	87.949	97.742	95.4873	105.239	96.5318	105.475	117.818	127.866	125.108	129.051	136.465	145.567	158.245	161.927	155.656	151.869	153.462	155.197	152.669	165.124	150.156	163.605	157.322	155.672	160.08	167.331	157.812	171.226	158.401	161.847
43.8822	48.1847	48.0764	51.258	50.7261	52.8535	40.8822	46.3217	53.0414	58.2166	39.5732	65.3312	74.8057	73.1497	47.5255	46.8057	41.4682	55.0669	62.0955	56.4331	22.1688	38.9586	23.7357	37.8376	27.1019	32.5096	28.0318	20.8949	22.5032	21.4236	15.9713	20.8535	15.4427	16.8662	15.9045	21.7038	18.7675	18.9076	23.1019	21.3471	22.2548	23.1943	27.8535	30.2675	38.9777	51.9045	54.8312	64.6178	76.7389	107.742
15.6592	11.414	10.8885	13.2834	10.1911	15.1115	20.5414	27.7834	33.8185	36.3631	29.4777	29.7261	25.7771	45.1465	34.914	31.2707	26.1338	19.5987	18.6178	14.8535	10.9936	7.73885	4.19108	7.64013	6.17516	12.8981	6.37898	8.58599	9.67197	8.5	8.90127	10.0032	11.4363	8.7707	13.5096	9.3949	13.4204	12.3694	6.52548	13.9236	19.4045	13.2197	16.5605	12.1783	14.5096	21.1975	16.5541	28.0732	25.9172	31.6592
23.6656	19.1146	21.5796	30.5382	7.98089	28.0318	13.7643	9.20701	15.3662	10.8057	13.2516	10.9968	11.7866	16.1401	19.1178	12.8662	15.6115	18.7006	16.6242	14.3726	16.5318	12.8121	12.1019	14.3376	11.8248	9.46815	11.1561	11.1911	10.8439	14.0223	13.3217	12.5828	19.0828	17.449	18.1911	16.8949	16.4936	10.6688	8.71019	9.49363	8.44586	55.0637	47.414	41.4395	34.8822	24.6433	11.2038	12.5541	10.4936	12.465
103.815	117.857	110.102	100.704	101.003	103.694	95.1146	121.096	119.599	103.908	102.529	111.035	115.054	112.344	101.21	101.019	110.981	110.621	98.5159	111.621	105.596	108.519	110.656	104.01	99.2962	100.175	98.0127	88.5987	68.4586	75.8153	73.7357	79.2261	78.2771	76.6306	79.5318	81.2643	80.4427	78.5127	80.7293	100.844	116.264	112.255	116.468	118.713	133.608	135	134.838	129.357	125.936	147.188
12.949	14.7325	13.7006	11.707	14.3376	9.31529	11.5414	16.6433	17.5828	45.4904	42.3376	38.586	41.035	43.2739	45.6306	31.586	37.7962	34.8439	37.4809	35.6688	44.7102	43.6624	43.4554	53.9809	64.4204	28.8822	39.5064	27.8121	25.8758	42.2962	72.2389	70.4745	73.4108	64.8631	77.8185	64.3217	69.8121	64.5955	59.1465	51.3217	46.7038	45.121	38.3662	49.9682	47.758	34.0127	34.1561	22.8535	19.051	30.5255
66.7166	66.5573	60.8726	62.5701	64.5796	79.5955	62.0796	54.9045	54.965	59.7771	63.5223	71.3758	72.3981	98.0287	112.605	110.064	106.885	125.774	89.0255	123.965	124.261	89.5	129.115	137.522	128.045	134.21	164.436	138.395	142.596	119.529	48.7611	154.946	177	183.955	154.146	150.834	156.736	133.793	105.752	45.5414	110.666	169.468	164.946	164.296	151.583	163.357	150.672	161.016	142.404	133.965
23.4363	16.6879	14.0446	16.9299	10.3917	20.8758	12.7261	17.6624	23.6815	19.8248	15.9076	17.4363	18.5892	27.879	28.8758	20.7707	21.5255	30.6051	23.1051	21.7197	27.5032	33.0127	30.3248	52.6943	52.3694	54.0605	65	48.8408	36.0127	32.7261	32.2866	21.8025	29.5828	32.2675	43.7643	46.8471	37.4713	42.2038	48.6752	44.6752	42.8025	37.3854	36.758	30.2102	35.8408	33.0287	41.4013	41.2516	43.5159	39.2611
13.6656	10.5159	8.58917	11.7293	14.7611	13.293	11.0096	11.3025	13.7261	19.2389	20.5764	22.1465	18.5414	22.4299	23.0223	28.086	30.3153	33.4904	41.8567	47.9204	52.3981	50.949	42.5318	46.0127	55.6561	52.9586	45.2898	49.5669	56.3376	51.0446	40.1561	29.5255	31.5255	40.9841	25.1465	24.2325	25.793	20.3758	19.5032	20.3599	20.4809	14.1338	18.5573	19.8535	22.1051	17.8631	13.7866	20.9713	18.535	17.6401
16.5064	24.9873	13.6815	12.2389	15.3025	9.86943	10.4172	16.4618	15.7611	22.4618	20.2484	20.6242	27.242	40.2357	38.328	41.6975	37.8057	43.6561	49.8312	68.8822	64.6624	48.3185	83.0191	79.586	113.564	107.707	117.939	123.497	120.108	131.041	118.545	118.892	116.748	123.382	105.589	106.439	118.334	104.57	93.121	85.4268	73.5892	76.0637	75.6115	62.4331	56.6051	43.6911	39.2325	33.949	26.8631	23.2548
39.3917	33.586	31.3535	30.5924	32.1465	22.0446	16.8535	17.9172	17.8025	25.742	24.0955	16.2389	20.9745	18.1338	18.6465	15.1306	17.8344	22.1529	21.1433	23.7102	31.379	34.414	36.3439	39.3185	63.8439	63.5032	56.3408	63.1943	45.7516	36.7962	38.5446	21.7293	31.4427	25.8599	26.9713	23.8631	32.4713	31.1019	34.4554	36.6115	37.4745	44.4968	46.6975	51.0669	55.1146	63.4427	64.0287	71.5064	65.8694	70.6019
17.2166	21.3981	14.5669	13.293	12.4841	4.76752	14.5669	32.1338	37.3185	26.5255	53.2389	54.1083	43.4745	45.2452	47.7325	43.2102	36.9936	21.3312	20.4268	15.3567	13.6943	11.6369	7.28025	9.04777	8.82484	9.69427	9.0828	10.5414	13.551	7.45223	12.672	15.8217	11.758	12.1783	12.914	11.1879	13.3949	15.8312	13.1815	14.6656	18.6911	19.0414	24.7325	29.1815	31.9268	26.0541	33.7134	28.2197	34.5478	35.9873
24.0987	23.0159	18.5701	12.8089	17.0446	14.5828	16.4299	22.449	20.258	18.914	16.0255	21.5414	24.4682	25.2675	23.7006	28.8726	31.4586	25.0064	35.6178	35.6051	37.7611	45.7134	41.3376	44.3662	46.9299	56.758	59.7707	61.914	72.9841	77.465	80.8089	76.1338	88.7866	91.4809	98.2484	105.525	116.812	124.599	139.446	130.076	135.803	131.615	142.08	130.048	111.099	116.494	118.662	112.691	111.959	115.723
75.3854	76.1178	71.172	67.2134	69.3439	77.5287	59.5573	69.5414	77.3153	81.8089	96.293	98.0987	105.777	85.8439	82.6783	92.6815	88.9904	55.3981	124.573	117.857	108.293	113.334	120.809	121.541	126.981	144.554	141.525	144.427	145.459	136.634	138.561	139.096	140.197	134.691	157.14	161.439	159.166	177.271	168.825	171.22	155.096	188.127	169.962	190.809	191.873	202.72	220.838	192.459	205.78	239.745
6.69108	2.8535	5.47134	3.52548	2.71656	5.87261	6.94904	7.76115	5.03185	8.97771	7.3535	8.02229	11	13.8917	12.4936	10.9682	9.02866	6.39809	7.82803	11.2357	10.6433	16.9713	23.1497	38.2038	17.4427	19.551	23.5478	21.5127	28.6306	25.4873	22.0064	72.6592	37.5637	55.293	38.6242	43.3758	46.7261	38.0796	62.3885	60.1019	47.4204	51.5987	46.879	38.5669	37.6783	37.5955	31.7484	29.9554	34.8535	39.5446
583.42	607.131	611.143	686.124	692.29	700.338	736.264	806.239	779.49	794.592	500.838	490.43	496.213	500.5	476.978	486.503	347.306	378.226	406.761	411.889	422.188	429.137	420.892	432.538	384.748	348.882	360.016	359.513	387.455	374.516	390.541	403.162	395.121	390.646	412.519	414.213	395.07	422.924	434.764	424.185	404.328	405.554	406.242	392.704	378.545	386.92	390.717	534.414	-1	-1
25.586	17.6306	16.7739	15.7834	13.207	12.6338	10.8822	9.87261	13.6943	14.9204	10.5892	10.7707	15.3025	10.1369	11.7197	10.8662	8.42994	9.45541	10.7962	12.3631	10.9076	11.4299	14.0732	15.9204	13.086	9.24204	16.5032	24.3758	31.0318	31.5382	41.2771	47.6369	50.172	50.5032	56.0096	65.0541	68.5191	73.1338	79.1146	69.6815	67.9586	69.1752	64.1561	62.3217	68.1178	51.8822	54.9554	58.2038	47.5573	46.5605
94.2134	92.8153	87.0701	81.086	71.6306	56.6433	67.2516	64.6465	53.2293	34.3726	29.1783	33.7102	32.4363	36.0573	18.5032	23.5924	20.0064	21.7643	12.086	27.8726	20.707	19.035	21.0764	19.7739	17.8694	17.1465	24.2962	22.586	33.5892	34.7229	41.7866	40.1815	41.5828	54.7229	51.2293	58.086	68.4331	64.7452	70.0446	69.5701	80.0159	86.1433	91.4936	100.908	103.099	102.71	106.013	107.156	108.548	106.003
70.3567	62.0955	60.6911	56.5159	50.2611	36.0318	28.0892	36.9045	37.3535	39.0573	41.9777	32.8503	34.8694	29.8025	31.6497	36.4777	37.7325	43.5032	48.9522	52.4013	67.8217	71.7866	80.5955	83.8153	106.688	111.682	128.583	145.322	165.927	190.637	195.061	175.124	223.707	245.57	260.424	281.809	289.341	305.984	312.194	308.146	308.834	322.713	338.984	365.159	356.809	347.207	370.083	389.089	373.904	371.42
107.895	97.3439	95.7834	92.0191	79.5478	68.8631	68.3758	69.2866	64.4427	65.8185	62.1688	56.7484	64.3439	61.6401	55.7962	57.7484	61.5669	58.7675	62.4904	68.8376	64.7803	65.6338	69.8153	69.707	82.9904	105.255	86.0924	125.866	139.857	156.831	175.105	187.58	196.701	207.908	230.022	243.854	252.229	267.245	266.637	284.895	275.726	313.182	318.962	333.697	348.019	349.197	386.58	417.373	395.513	407.124
107.49	124.303	115.538	103.408	116.417	109.15	98.8662	104.083	85.3153	72.9045	103.736	121.634	113.344	117.831	115.287	112.124	96.8885	107.557	106.729	76.8726	109.624	96.8662	94.1274	96.828	99.121	116.984	125.828	136.952	141.188	154.287	141.083	152.006	148.962	148.395	172.723	161.742	170.363	194.908	192.309	199.379	202.857	223.354	238.045	243.717	252.685	242.344	270.965	295.911	279.287	293.08
73.1624	72.2898	75.8121	76.2803	88.8408	84.0541	86.3535	71.3503	83.4076	88.8917	88.8822	88.4522	88.4395	87.758	89.8694	89.793	95.3694	99.6656	93.4522	110.583	121.955	111.398	120.965	115.108	123.153	127.303	113.621	155.404	152.927	153.379	138.825	141.506	126.914	127.917	118.669	129.901	128.889	132.373	111.306	111.847	107.436	100.487	94.6783	124.223	119.287	107.605	100.959	101.433	96.1529	88.6847
34.0191	36.0987	33.9045	29.6178	27.7166	27.1911	18.6083	15.7484	20.1146	19.879	25.1497	19.5541	23.9076	21.8917	13.3885	21.3025	17.6083	23.4045	42.6051	36.1783	44.5446	31.1975	22.2389	13.2962	18.7866	15.5287	19.1019	19.8408	24.5669	14.535	16.9459	18.8153	19.6146	24.7771	20.3822	24.328	29.8153	38.551	44.0223	49.6465	72.8503	74.2707	95.3057	99.0573	115.984	127.382	135.618	157.78	144.589	143.255
59.1401	68.379	60.7452	58.4427	68.5159	45.2611	51.2229	43.7197	45.7357	52.1115	74.2834	71.8025	74.6306	64.8503	68.1433	57.8726	54.4873	57.1369	81.465	87.8153	75.5924	89.3599	102.876	77.742	43.2261	37.9554	45.7643	34.5764	31.4172	32.5	30.2611	34.0255	37.4841	48.0955	58.9777	69.4108	67.8822	80.9268	83.2675	77.0064	81.6975	107.019	105.006	104.446	116.567	136.787	169.592	187.389	180.99	172.283
5.10191	13.0382	6.83439	4.74522	2.82803	6.78981	4.36943	7.9586	6.67516	7.19745	7.54459	6.71338	5.2707	6.31847	7.96497	9.13376	10.4363	11.6274	6.96815	12.0892	9.52866	11.8312	12.2516	9.1051	13.8089	12.2484	22.0414	24.2611	21.7484	17.914	21.8662	24.8471	42.0637	39.0318	29.1783	38.1146	29.8949	18.3057	18.707	18.4682	13.3503	7.13057	10.2197	14.9682	14.6943	5.05732	6.28025	7.98089	6.53185	6.71656
7.42357	7.57962	6.7707	6.96178	5.41083	13.0191	5.05732	9.19108	6.05732	7.39172	5.57006	6.01592	7.26433	5.29299	7.53822	9.8758	13.1943	10.8917	9.71975	9.31847	9.67834	11.9873	11.2006	12.2006	9.08917	5.3949	28.2803	27.0159	26.8248	28.2994	21.2261	26.6178	16.3057	18.3153	14.3885	15.8312	22.6274	19.9841	18.9809	21.3949	18.3981	19.8726	25.9395	17.707	21.7357	22.4331	35.5127	30.6943	35.1465	39.2484
107.643	108.535	108.395	118.895	112.118	109.678	107.373	134.048	130.118	138.076	152.987	145.048	156.994	167.895	150.532	161.213	169.962	172.608	168.462	190.968	197.296	214.863	210.49	215.659	225.621	214.213	245.408	281.975	287.411	287.65	324.723	325.354	300.599	307.85	305.414	319.455	320.121	339.236	357.838	356.5	352.78	370.08	414.395	414.764	419.503	447.962	464.914	516.799	492.274	509.946
12.5573	11.3503	9.6879	7.02866	4.94586	2.93631	3.03822	3.52229	4.64968	5.6242	7.87261	5.60828	10.6879	7.61783	6.59236	10.949	14.4204	9.55732	10.4841	13.3312	16.0064	20.2516	27.8408	27.7229	34.242	37.328	49.4013	58.1465	56.1783	53.9682	49.0732	54.9936	53.2675	48.5446	43.0573	38.379	39.6433	36.5	40.2452	46.7389	39.5287	37.3376	50.4363	48.0318	59.1497	60.2866	58.0318	61.9777	66.3567	68.1019
29.2739	24.4586	16.7643	14.586	8.26433	19.0892	14.7166	9.55732	17.707	14.7357	26.1401	19.8471	22.9777	28.8854	22.1847	23.3631	30.414	28.6274	27.758	28.6115	36.6401	35.6815	53.207	55.4968	65.4268	53.9586	70.1561	62.1306	70.258	67.6752	71.0287	78.2357	85.3089	81.0255	95.4618	109.532	96.828	89.4777	80.6943	74.414	60.4522	68.4299	67.5127	87.4045	78.4076	72.9045	75.8408	68.8471	75.3344	68.3439
31.3885	22.7197	18.2643	28.7006	29.6529	15.6274	25.8567	23.0732	21.0764	33.7994	31.4172	25.1369	24.2771	29.7389	32.3885	36.0446	35.4809	41.5637	45.1879	49.4554	52.9554	45.0478	41.2293	46.7611	46.5573	50.9936	43.7898	57.4076	52.9204	44.9682	48.8312	50.4299	55.2357	48.6115	48.1847	43.0414	38.3631	42.535	34.328	28.9968	26.0223	30.5159	36.3376	39.4395	36.9268	39.8121	42.4013	54.7197	43.7134	60.586
165.131	156.503	137.057	132.694	122.427	96.9522	115.93	110	74.742	73.2293	77.7038	54.4873	57.8057	57.4459	53.3694	45.6146	73.9395	76.7898	54.5732	45.5541	49.5	50.1019	42.0127	53.3376	47.7834	55.8185	51.0446	54.1975	65.3758	66.5096	70.7261	89.4618	97.8312	105.43	114.051	121.904	132.236	134.984	159.449	176.312	181.975	196.605	200.191	221.15	235.242	251.65	257.287	266.927	257.404	251.994
54.4236	57.5669	54.4745	23.8217	37.0732	31.6943	46.4841	32.4586	46.0127	31.6115	45.6529	30.2739	15.1019	41.793	28.0382	28.5764	28.672	41.7389	34.2452	43.207	44.4841	53.3025	49.2675	63.9459	82.0191	76.5287	95.5318	57.2834	74.3439	50.0701	57.4172	76.0701	74.6879	58.5987	59.0796	54.6975	56.5796	51.4522	54.0828	44.7197	49.1306	42.0255	35.1624	41.4809	34.8917	31.6879	24.2038	33.5541	22.9522	25.9236
49.5732	41.2325	39.7484	51.3185	38.965	45.5605	38.5796	48.9013	43.9363	36.5796	43.8917	73.0764	75.8694	73.3408	55.4268	50.4809	53.9554	52.4172	49.0701	57.4809	55.4268	63.5828	57.1433	58.0637	56.9395	60.9777	63.9299	58.7293	75.0032	75.0478	79.4873	82.0032	76.5	78.8662	67.5701	61.2516	59.1306	60.7293	60.0032	60.8408	51.1083	48.5318	45.8503	56.8758	40.5924	39.4809	55.328	83.742	54.0318	48.7357
18.0573	17.9013	18.793	15.1019	13.086	10.5318	11.4427	10.4363	11.0127	14.5955	11.3344	8.1879	13.8439	15.0223	17.8822	16.9713	25.172	17.9682	23.4809	17.5573	19.8599	26.2516	20.465	18.8439	25.379	21.7452	22.5446	23.5223	28.949	29.8185	36.586	38.9936	42.1624	48.4204	42.0382	43.4427	39.4554	32.5	26.8471	28.7325	23.6401	27.8694	20.6178	28.9045	23.8376	32.3248	33.8057	33.9268	34.5223	37.4172
62.2994	56.9172	58.5318	77.6624	56.9936	46.4076	41.2197	40.9809	30.3631	30.3471	29.2898	25.6497	29.9395	24.4713	22.4395	13.6178	19.3981	27.0223	18.9618	26.6178	25.6783	26.0127	17.9395	15.3822	17.8949	38.1847	30.2834	36.2325	27.3981	28.1274	27.793	31.8471	29.758	24.258	39.6146	39.5255	47.1178	54.0255	52.7834	60.4427	47.8376	63.4299	58.9204	53.879	41.5446	58.5828	58.2229	39.4841	68.9013	74.1815
406.166	416.213	425.825	347.439	280.793	392.997	306.277	453.312	497.191	496.513	513.293	585.185	541.72	586.624	533.36	521.901	537.631	511.71	460.666	482.172	497.882	477.15	486.694	470.863	523.22	479.599	531.589	507.347	493.532	430.85	447.366	445.793	432.866	454.325	403.799	373.232	372.213	339.15	371.803	356.194	378.538	345.85	362.946	408.369	362.732	350.596	357.475	385.736	367.713	388.796
11.4618	7.10828	133.118	8.04459	9.87261	12.3917	14.4777	12.5637	15.0159	17.1975	14.758	14.9331	14.5	17.6975	17.8917	20.2898	19.4076	20.2484	21.8121	26.8344	27.3885	34.8153	33.3153	36.0223	34.6401	42.0223	34.793	45.9522	40.0669	40.4204	29.8057	31.3248	30.6051	29.1369	21.7134	25.8376	25.1083	24.5478	19.2994	23.7866	24.0478	21.9682	21.9904	37.3408	29.7611	28.3949	31.6752	31.9873	29.5191	26.9618
47.1911	25.4427	24.3408	26.707	20.6338	24.3535	20.1306	29.1401	29.5191	36.0924	34.379	32.6529	30.0382	25.3025	22.051	22.0637	26.7389	25.8885	25.121	27.1178	23.9873	21.9904	20.949	22.7134	17.7898	26.5318	22.6369	25.7006	29.621	28.1688	36.2293	31.8408	36.9554	41.6433	39.8599	49.2962	55.6274	62.7611	67.4363	79.3631	92.7357	100.379	110.475	125.994	119.283	133.277	131.799	136.22	143.933	133.653
159.529	169.5	164.236	164.583	151.675	156.685	155.64	136.131	132.357	131.592	114.748	133.717	123.618	134.748	134.818	131.822	133.417	140.417	127.771	143.895	121.892	138.245	156.121	128.736	150.003	147.659	131.586	150.204	148.917	132.685	155.118	132.522	125.252	118.729	111.016	101.185	92.9682	90.5669	91.8758	92.2803	92.0955	92.8854	98.3089	100.592	93.8217	122.952	114.427	123.07	132.363	132.535
134.889	108.392	103.041	83.9777	86.9363	109.092	99.8153	112.535	142.573	105.608	107.796	161.226	199.449	252.787	306.847	191.115	146.22	156.854	206.726	237.567	278.462	232.185	210.736	262.051	283.038	262.182	138.357	140.096	136.688	127.236	129.188	118.939	135.841	111.85	119.032	122.146	130.277	133.162	130.013	129.688	124.166	116.586	114.58	121.678	118.137	127.054	116.994	123.459	123.701	125.573
82.2357	83.2834	78.1752	76.4236	87.2675	70.4841	82.8089	90.3567	98.551	94.9268	102.252	113.156	105.758	103.51	119.768	123.809	101.914	80.3758	98.4841	110.901	113.799	125.099	122.513	96.3981	121.274	136.662	132.076	136.29	151.882	138.341	146.118	147.287	176.72	179.882	144.748	129.137	214.573	137.29	129.742	139.494	145.255	102.917	114.847	98.8439	136.908	98.4076	120.806	121.108	121.277	114.201
7.88854	5.8949	5.97134	8.57962	7.39172	8.14013	4.18471	7.92038	5.68153	5.33121	7.46178	8.17197	10.2038	8.21338	10.9172	10.2389	9.20064	5.92994	14.3599	15.4586	16.207	17.4204	22.8471	25.6592	28.2102	22.7229	24.6752	26.0255	27.7834	32.5828	28.9777	25.6083	31.6115	42.4076	42.051	42.1146	39.2197	37.4108	39.1019	43.4108	52.9777	48.8439	42.449	38.3694	37.2643	33.1274	28.793	18.8567	9.16561	6.01911
41.8758	37.5032	31.1306	26.9777	39.5191	27.9873	33.3248	30.1911	21.3949	18.3089	17.1592	21.3631	18.5637	23.4936	28.9108	38.0987	20.7866	27.793	23.0223	20.9618	19.4936	17.7516	32.7102	38.035	34.6242	34.258	39.7293	25.8376	25.7452	31.8758	36.7962	31.2484	25.4522	30.4427	24.828	35.0605	21.7516	31.6051	38	35.9459	29.7484	40.3121	25.0669	45.9172	31.4204	40.6529	39.6306	34.5382	36.9045	33.8535
34.328	25.7962	26.7389	25.535	28.1943	24.2357	25.4363	24.8854	25.2038	27.414	25.9299	23.5669	26.3599	23.4045	23.8185	25.4459	23.6306	11.7006	23.1146	30.5032	21.0096	17.5955	20.4013	20.4936	17.6433	15.1146	22.1592	21.7962	24.0478	19.7834	19.086	21.2452	21.1178	22.4873	24.6879	25.7484	23.8503	25.2866	36.2452	37.4904	34.5828	49.0605	44.1242	48.4745	56.4586	44.5924	48.2516	52.7261	61.1879	62.5669
44.9968	41.3758	38.551	32.5159	26.7293	36.2261	47.6019	52.6115	43.5032	27.2197	28.6656	25.6115	24.9427	22.8376	22.1975	25.5987	22.2994	23.5064	26.5032	18.1529	25.4777	15.0669	24.9968	23.1847	19.1879	17.8981	14.2484	15.6624	21.7484	21.7006	24.3376	21.2134	14.4968	13.621	18.8854	24.3025	28.949	19.3503	20.4076	27.0446	28.2134	37.2229	26.9268	21.0701	32.5255	30.1115	26.758	37.9904	34.6083	32.8344
27.1338	29.3153	38.1146	30.9331	30.1083	45.7389	37.2229	40.7739	44.1401	38.8025	24.5605	21.9968	20.2293	16.8439	18.3089	9.53822	14.9873	12.051	16.965	16.6943	16.0287	18.672	23.5987	28.3758	34.8121	24.449	17.0955	21.4427	22.1369	24.1688	12.9745	22.5924	30.7166	31.4045	37.0159	38.3726	47.8057	43.2866	50.8631	46.3758	57.414	57.5669	65.6529	70.3631	64.7038	72.6306	53.586	51.0382	46.4873	45.7707
50.5032	49.879	50.0637	48.8917	47.6592	55.6433	54.9299	44.9873	41.4809	41.5669	32.3025	33.4108	38.379	36.7739	30.3567	26.6019	37.3376	35.3662	27.035	28.0987	32.4586	28.086	30.1401	31.6783	40.1815	39.2675	36.0955	33.3917	30.6115	34.9108	28.1529	30.8535	44.1624	25.2675	27.1529	30.4395	27.2643	31.5701	27.2707	29.0924	26.0191	32.8917	29.3949	31.2197	35.4427	34.7771	37.9682	45.3185	37.9522	45.0223
13.3662	13.8057	11.4331	12.9713	13.293	17.6879	13.6433	11.3344	5.67516	4.8535	8.24204	11.742	13.5732	8.77707	16.8726	13.6338	14.9554	22.6561	31.3503	21.3344	37.9936	42.7038	49.5764	52.1051	46.9331	43.8631	40.3567	35.0955	31.535	34.0382	31.0191	39.3822	27.6083	38.4777	37.1306	52.1369	42.5764	30.3439	26.1019	23.8726	15.9427	15.8185	15.6911	14.7675	15.2707	10.3217	10.0287	9.28981	11.035	7.90127
58.9076	49.0318	46.2803	42.9968	45.3439	34.2452	38.5064	27.8535	36.965	33.2771	35.4268	31.2611	27.0032	38.2102	26.1178	56.6656	27.5637	36.414	37.9745	42.4363	47.4713	51.9968	44.6115	50.793	53.9682	45.9204	34.1019	35.742	27.6433	30.8599	32.2994	33.172	28.3248	25.1115	28.7834	29.3822	25.4363	27.3025	27.2389	24.2357	26.5541	19.7771	39.4618	61.3917	60.2102	81.3567	41.8822	44.9331	55.2261	52.0446
27.9777	16.3153	14.7261	15.051	17.2197	14.8376	10.8376	12.4236	13.5955	9.08917	11.379	16.3662	19.4682	25.3885	33.8631	47.8885	58.8153	56.9873	74.6656	71.7516	88.0478	98.5573	84.0096	105.213	63.2707	88.793	100.978	96.7643	107.032	107.49	113.067	121.232	136.58	156.927	136.131	141.092	130.443	129.889	120.943	112.226	113.943	117.217	123.5	141.809	142.073	158.774	173.554	176.264	180.089	177.08
56.051	27.1338	65.5	25.8631	24.8535	25.7325	13.3822	21.9713	14.5669	15.9682	20.2038	19.7866	21.0955	21.9204	31.0191	34.4268	25.3567	17.1338	27.4045	25.1401	28.207	23.4045	36.3376	40.1465	34.5255	30.793	36.6083	38.5669	41.965	47.2261	43.8025	53.5032	55.3854	74.8885	70.8376	67.1242	73.1847	63.7325	77.9936	83.9873	85.3694	96.6242	94.8312	108.255	98.2325	104.274	116.516	122.331	137.984	137.446
29.9236	17.8089	13.793	20.3439	18.3248	23.1115	51.2611	108.548	139.252	161.092	164.089	133.089	125.841	98.3662	60.5191	94.7325	106.194	71.9172	54.4331	24.5223	31.5796	21.4554	15.4777	19.5701	32.0669	27.1847	26.2229	28.5127	26.758	31.1656	26.8535	30.2834	38.2739	37.758	36.0478	34.914	41.4299	38.2516	45.9013	44.9554	38.9809	44.5382	44.242	57.8503	40.5478	41.9045	53.3822	44.6178	42.1815	52.0382
44.535	41.6975	53.758	57.1306	54.3599	53.8917	56.9076	55.6465	51.6815	53.0127	43.5955	46.7707	53.742	43.1083	34.5605	45.7834	65.1656	40.9045	47.9586	73.9618	48.9076	27.9936	22.8185	23.9841	26.242	26.3885	34.2771	30.8121	27.5796	29.5764	32.4395	33.9841	37.1975	37.2516	37.6242	30.0064	39.9299	33.4013	34.2611	24.6975	25.5318	33.8599	34.7166	37.1083	35.6783	41.2803	45.7675	53.4236	55.8089	55.6943
107.803	97.0478	105.866	90.6624	105.344	97.6752	105.58	108.72	129.459	158.067	180.567	193.127	202.917	209.949	201.567	189.682	184.038	191.118	201.694	208.933	211.137	231.293	223.564	251.742	276.64	282.863	278.299	271.828	269.268	257.694	260.965	248.592	242.831	232.707	242.159	241.127	237.838	221.299	236.274	254.293	247.768	258.532	249.293	261.978	255.048	247.685	227.099	227.271	197.682	211.035
66.5064	69.4427	65.4427	61.5573	62.0955	69.7643	73.3917	74.8981	73.5	74.9936	63.9076	73.9172	79.9299	84.1752	80.2675	89.7739	92.3121	102.799	96.9809	97.6497	111.503	117.866	120.146	130.745	140.981	158.264	176.293	169.268	177.688	153.029	159.908	172.226	159.646	154.675	147.111	171.29	170.43	166.952	153.452	167.548	164.936	193.121	178.054	184.436	175.975	183.732	162.697	166.465	161.086	172.659
87.3949	85.5924	83.2102	93.7707	138.395	97.8025	89.8376	91.6178	100.268	117.914	112.258	126.653	124.949	114.904	127.468	125.057	145.283	145.468	139.252	159.889	161.236	168.118	182.373	193.455	163.035	173.277	172.239	157.65	155.061	156.742	166.978	171.72	183.013	171.494	171.615	179.07	192.045	180.876	178.169	175.688	174.347	181.449	181.975	205.631	223.535	235.675	275.051	200.605	196.127	214.344
107.93	101.615	100.054	89.6083	101.376	84.2611	77.7293	81.0637	86.7516	143.72	150.283	140.22	178.236	172.404	117.959	146.599	153.054	190.752	210.608	235.704	197.22	252.245	296.115	302.825	281.382	303.503	323.067	309.822	314.322	306.946	287.322	278.143	272.398	259.822	291.662	275.777	273.223	296.901	311.519	329.506	344.646	352.589	374.758	384.892	365.844	342.72	330.946	389.331	437.404	417.115
110.729	128.857	117.548	119.045	118.583	114.806	120.006	87.0159	112.997	119.806	120.946	122.35	112.653	114.392	117.904	140.229	135.185	145.736	149.28	176.395	184.615	184.096	191.662	196.818	208.627	219.596	229.828	245.58	254.981	254.99	255.691	238.08	272.761	292.124	293.373	297.838	284.452	263.841	269.892	276.264	266.748	289.274	309.229	304.879	303.643	331.917	323.153	283.162	293.946	290.389
73.5064	68.7197	64.3981	59.379	56.2134	50.3471	51.2038	56.4713	75.551	81.7611	105.468	88.7898	96.7898	97.1146	89.4809	72.7389	73.3662	65.3949	69.0414	73.1401	80.0318	76.3885	70.0637	73.6688	67.7325	56.8248	57.0127	57.3376	44.8662	47.8025	38.2261	36.2229	45.6146	41.707	39.8822	38.6369	35.4904	40.2325	29.121	25.8471	34.8057	34.2452	44.2229	58.1879	51.0414	49.5892	61.8376	64.5892	66.4268	63.9172
69.8471	62.6783	50.7006	40.4809	33.7516	29.4682	25.7803	24.9076	28.8885	20.742	24.8694	25.6465	25.379	35.3917	40.1656	49.0637	65.1688	59.5191	55.6815	63.1624	84.6529	83.6529	77.758	89.242	88.5	98.4904	99.9268	85.3376	88.7038	83.5605	93.4618	81.6656	85.5414	84.2834	87.8917	80.5	93.2197	91.1752	90.707	99.2994	80.0828	96.1242	57.8312	85.379	79.7516	71.4841	52.3503	59.6115	53.0382	49.6242
31.1656	32.3153	40.6465	25.1433	25.5955	25.3503	26.1306	42.8981	42.8408	49.6242	97.2134	103.911	73.6051	57.8376	36.2102	40.0637	38.2643	46.7357	37.8439	24.3248	47.8025	34.3917	25.8822	25.1592	23.5732	28.6306	22.258	19.1083	22.8981	20.535	20.7516	20.328	20.828	36.8439	20.8949	21.1338	27.7866	26.7994	34.6847	24.4554	37.3854	44.8885	28.0032	40.8248	38.742	49.7611	53.9331	59.6242	55.6752	62.7898
48.2707	40.7261	41.293	43.5287	43.1401	27.5987	23.1178	35.1178	31.1688	34.5764	39.4682	32.5159	36.2866	65.5446	69.3217	67.035	51.6242	44.4904	42.5159	29.7134	34.4363	22.9363	55.7038	29.7452	27.5541	30.9013	41.8185	37.9299	40.9745	40.1943	31.0223	36.1815	41.7834	42.1497	49.258	42.9204	50.1019	55.7643	58.0637	53.9045	65.6911	55.1943	53.1497	68.5987	71.1274	69.5828	75.949	68.9395	71.0573	73.9459
9.00955	12.0892	4.69745	14.465	7.80255	3.81529	6.56051	8.67516	10.1529	11.3025	9.41401	11.1943	9.34713	12.0478	11.1338	28.0478	31.8025	31.8312	41.2675	28.0955	30.8121	39.3217	39.9968	52.7197	46.9936	48.3185	51.7452	68.6338	73.2866	66.5382	65.7516	52.6433	46.7707	29.8631	47.3344	50.8885	56.3248	53.5223	52.0287	34.9554	28.3057	36.7548	49.5796	28.6752	16.2643	9.8758	12.7611	8.29618	10.6051	7.32803
26.0032	21.8153	23.3025	15.6592	15.6051	14.4459	14.2038	13.6274	15.2516	9.88217	14	11.5478	11.3949	15.0318	15.7166	15.0573	19.328	19.328	14.5255	16.3917	26.4427	26.9777	37.3248	39.9873	60.3917	53.0573	47.6847	50.8662	35.9682	34.2898	22.7962	16.6592	24.2261	20.3949	27.086	28.6338	44.4873	46.5478	45.5924	58.6975	58.8312	70.5764	60.3949	75.4618	85.8089	98.5796	106.061	114.153	119.79	120.939
20.2166	15.8726	16.6879	12.9873	10.8376	13.2038	11.3854	19.8376	14.2675	13.9268	12.1146	12.172	15.6051	10.758	14.1401	20.9809	16.535	24.2006	28.828	27.7102	24.2357	20.4331	29.8312	36.8535	33.1688	35.414	44.6146	49.6561	55.5318	60.4395	61.9809	78.6465	88.8662	83.7643	84.9268	80.6369	97.8758	85.9299	91.6178	80.7771	97.5924	92.6083	92.9586	94.4873	94.3344	80.1847	82.8344	101.185	106.306	109.774
16.3726	12.3185	11.2962	7.80573	11.6083	11.5637	6.50318	7.00637	7.21338	6.49363	10.6656	10.6146	13.7866	9.47134	12.9841	14.3439	17.4904	22.8089	22.8439	29.9459	31.2643	28.5573	45.4299	46.2006	45.8153	45.3439	52.5127	58.9841	57.7166	63.6656	68.2484	69.1019	64.3121	77.7803	76.0764	84.5669	94.4777	86.3567	98.1083	93.8057	102.615	104.755	110.962	112.713	115.745	126.134	124.58	128.844	114.85	111.959
9.63694	11.7261	11.2325	6.14331	8.20701	5.83758	5.63694	8.83439	7.30573	8.42038	11.7962	10.7102	15.0605	15.4586	21.0828	21.7038	22.1401	26.6911	30.2898	25.3535	34.0892	29.8599	36.9013	35.4076	32.7006	37.8025	47.9841	46.3503	48.7102	52.4777	50.7197	46.8758	46.8344	49.086	46.3503	45.7739	52.3758	36.0796	44.7866	45.9873	46.5478	31.7611	29.1975	38.1688	34.6051	32.7898	28.6911	31.758	30.0159	32.2516
19.6561	10.5637	10.6369	8.24841	10.2771	3.49045	6.56051	9.5828	11.7643	5.69108	8.8758	12.1592	8.89172	14.8726	14.0223	19.7134	17.1688	25.1879	29.4936	23.4745	29.6274	34.7261	34.742	43.6624	42.9841	56.2771	69.1083	64.2834	65.7898	81.6975	84.0318	94.8408	80.8217	63.1083	58.9427	54.6975	65.6624	55.9777	51.2675	57.9904	48.9172	39.7293	40.6656	41.6146	37.3631	41.1624	32.7293	29.0732	28.5096	25.4904
40.8917	31.5924	40.9076	31.8822	32.449	35.7962	27.5096	29.2229	31.9395	23.3312	30.8503	35.621	33.7389	42.1815	46.8408	57.4554	65.8025	65.5732	85.8631	77.4459	79.1274	77.7357	73.965	83.051	77.2994	78.0669	81.0605	90.6019	85.5732	92.5924	93.1752	97.2389	93.1561	98.7006	97.8758	92.914	97.9331	84.4204	96.7389	88.7261	92.0796	88.6592	98.1656	102.325	103.159	97.0987	102.611	97.949	115.876	116.156
241.229	224.742	213.347	199.016	178.513	191.592	170.478	183.096	176.051	174.538	161.834	175.363	168.057	165.541	161.283	164.312	157.385	160.943	153.707	164	168.962	157.411	155.366	177	157.99	163.682	169.981	169.347	161.532	153.793	156.245	158.78	153.634	147.869	146.089	141.312	155.742	148.519	145.252	149.029	141.166	149.204	145.506	158.656	147.634	154.338	161.124	174.522	170.755	176.793
21.0255	16.2197	15.8758	14.2166	14.3248	12.9745	13.8567	18.2452	13.0255	14.5955	16.7229	16.0732	16.8185	18.1306	21.051	15.5255	18.9777	20.3949	20.1051	23.5223	26.3949	27.1465	24.2803	34.1529	33.5414	29.3217	33.3217	37.535	52.3217	50.0032	34.7962	36.5987	22.965	27.3376	14.0382	12.1146	14.0637	11.2229	11.0287	12.6369	10.7898	11.6561	19.7293	16.3185	22.6178	21.6433	25.7675	29.4713	35.1752	23.5287
12.6975	13.3631	12.1592	10.8567	13.3248	8.00318	11.1274	14.3312	10.9682	16.2038	11.8822	5.29299	14.3471	12.6146	9.23885	12.2134	12.3631	16.4299	23.4363	15.5987	19.9968	29.7898	20.7389	35.086	26.3312	32.7611	36.5892	48.0637	54.0287	63.0828	55.9936	57.5127	50.3312	50.9427	48.0987	32.9809	38.3471	36.0573	27.6561	23.914	20.2516	25.0701	26.9777	19.9936	20.0096	20.8949	18.7166	19.1879	20.6306	19.1656
9.66879	9.67197	5.23885	11.0892	7.30255	7.78025	6.26752	9.30573	7.64968	7.8949	5.57325	4.30892	9.49682	9.57006	6.20701	4.63376	8.23567	10.4108	8.53185	23.8949	23.9904	28.7261	33.0096	42.7962	49.4968	62.5478	75.7389	82.0159	91.5127	100.166	120.118	114.086	113.439	102.685	98.1688	90.9586	94.9299	88.793	99.6656	101.889	101.621	102.404	94.8949	91.551	83.9809	82.0669	80.4268	77.1306	78.9076	73
101.038	100.834	105.564	95.4841	78.5	111.895	59.2357	71.9299	70.2962	251.924	253.382	257.656	249.178	170.146	136.439	157.22	159.551	159.032	181.841	157.115	124.959	96.9395	63.5573	37.4522	47.4968	47.4841	50.3089	68.6592	81.3726	45.3408	55.4873	57.9522	33.1019	52.6879	38.1624	58.3153	56.4777	53.5669	71.6624	66.8535	74.7516	83.1943	89.9554	100.729	105.328	115.513	116.643	123.71	123.099	136.083
7.92675	10.8089	10.379	6.30255	10.586	7.87261	5.17834	5.34713	6.73567	4.98726	7.4586	7.60828	9.56369	11.6911	8.21975	8.52229	13.5064	13.5	6.48408	10.1688	11.9586	11.2834	14.6975	22.6783	18.5701	12.3153	13.3344	20.8439	27.2229	26.5955	34.0032	39.5764	23.1497	34.3471	37.9299	28.879	28.7389	30.3057	20.4554	17.1783	14.8758	11.1146	12.1274	12.2102	13.2994	14.9745	11.2739	6.63376	8.68471	9.1465
21.9586	21.0605	21.1433	18.5732	22.6656	20.6465	21.3917	23.8025	27.7866	21.7675	27.5032	19.7484	20.7771	22.9968	30.1752	28.9904	27.4013	35.3822	38.0414	51.7834	41.7834	39.3822	35.9554	37.0637	36.6815	37.0318	46.3535	53.0382	52.2898	59.8089	60.8089	71.2357	74.5987	70.0892	77.1146	68.4299	67.7771	54.2771	66.3121	57.0924	39.4809	47.4777	41.5828	38.3217	36.1274	33.1688	24.551	26.4204	22.9554	24.4172
35.4554	25.2866	39.8917	18.0159	18.9045	19.4682	12.4268	11.3567	16.4076	16.0223	14.0669	15.379	16.1465	14.4013	12.6911	20.0478	22.1115	19.2325	24.4268	43.0637	36.0287	37.3535	23.9363	36.672	40.3153	35.7516	35.7866	43.5669	40.4745	57.5764	66.9045	61.1178	63.0127	60.9777	61.6624	51.9299	58.2675	49.2229	76.3153	59.1975	65.1465	54.6146	61.121	41.3599	40.1306	42.1783	42.4586	25.8631	18.1561	14.0096
41.5669	40.3344	31.2962	32.1943	27.9395	23.4459	13.9873	12.8153	11.2707	24.5669	31.2611	30.3185	29.3662	32.3758	46.4809	55.1051	36.621	54.8376	53.5541	42.2261	40.4459	36.4936	43.121	40.6019	36.9745	41.5828	42.3631	44.8662	48.6975	39.2771	44.7739	43.6497	36.8089	34.7325	37.8217	48.6943	55.4745	63.0223	75.6465	86.2548	65.8917	86.8981	91.5287	88.8312	90.7675	76.3185	75.1847	83.3121	78.8662	74.6465
38.258	41.4236	33.4873	31.1815	33.9809	24.6338	20.8694	19.7739	31.6783	37.7293	43.8662	52.0255	39.707	34.6656	28.2643	39.5032	40.0064	45.8949	49.3121	51.7325	53.3949	45.9809	50.8439	50.4299	55.9586	59.1115	48.2452	66.9268	62.3599	67.5127	70.2771	74.3057	79.0096	81.9395	80.0892	81.9936	81.1465	87.1465	88.6274	99.7452	88.7516	100.245	104.611	101.761	114.806	110.965	114.475	117.573	133.277	118.71
75.6306	74.0446	56.6369	42.6274	38.6242	24.6115	26.6943	27.0955	24.7898	27.8535	36.672	40.3121	37.8057	46.7707	42.535	48.4076	63.6592	47.7357	54.5828	53.7197	56.4363	55.4172	52.8758	60.2166	47.7038	54.8089	63.9713	75.5382	51.8057	54.8057	61.9522	61.1274	67.5382	56.5924	68.1624	61.5064	59.4936	58.8153	67.965	60.5159	92.1975	91.6752	84.672	83.0478	102.449	132.194	133.812	121.717	132.592	141.522
45.8662	40.1401	31.6783	34.5955	30.0987	19.2611	19.8694	25.2707	21.4331	32.9936	41.2006	39.4331	46.9108	45.3885	50.5987	49.0287	53.9108	49.449	46.742	41.8662	38.6083	27.4395	37.6561	27.8631	27.8248	37.0318	35.6083	36.6306	35.0127	39.6178	37.1688	47.5096	61.9809	66.6847	83.1401	96.1847	86.2389	85.742	91.7771	102.739	99.965	111.064	111.914	99.4873	109.5	94.1592	125.764	113.583	113.548	107.761
23.9777	23.9045	18.6433	17.3981	18.9618	16.9968	15.449	20.3344	10.0287	20.5318	19.8025	14.7548	30.9873	32.0478	15.8535	17.7866	9.84076	12.3025	6.21019	7.6879	8.71656	7.07643	8.57325	10.1592	11.3662	10.5096	11.1879	7.2293	16.8121	14.8631	18.7548	27.9427	30.2452	28.5382	27.8917	24.465	27.1146	24.8726	18.1083	21.793	13.7611	17.0924	14.2707	22.0669	20.9809	27.2197	32.8185	38.4331	43.293	37.7166
33.9586	35.2707	39.2389	29.4013	24.5764	26.6847	19.5701	26.3439	31.8917	30.672	34.3344	28.5223	32.3631	33.2006	31.5478	31.3057	35.4745	40.3599	42.8248	43.1306	47.0096	43.8471	48.3217	41.1274	48.6274	51.0669	47.914	58.879	65.8312	65.9363	62.2675	67.4395	73.1083	66.5701	43.2229	52.9236	64.2611	62.2962	60.7962	58.0605	56.172	43.7962	47.742	40.3726	39.6242	34.0223	28.3535	30.5987	30.3599	38.5605
29.2102	27.8758	25.0573	19.2611	26.3949	20.2229	23.3217	23.8408	29.3376	26.4873	26.6688	21.6083	20.2834	18.6624	21.4968	24.9904	26.8248	27.035	27.7611	31.6306	23.3057	34.3885	29.8408	38.242	37.8185	41.1115	53.172	53.3471	68.5701	76.2293	50.5	78.1019	65.5223	59.0223	74.6847	73.7962	60.4459	55.3949	51.914	52.6879	37.4904	58.1529	58.8758	53.1815	38.8981	30.2643	23.672	21.2389	16.1624	19.0701
17.5	10.9841	10.0255	12.9013	9.88535	7.11783	10.621	9.55414	7.46497	6.66561	9.43949	8.67197	15.0764	7.46815	6.01274	7.99363	6.28981	9.10191	11.8312	9.50318	12.414	9.20382	11.3344	8.9586	11.7389	29.742	24.5669	25.4268	31.4427	34.051	42.1306	52.4268	47.3089	42.3662	40.4013	42.1274	32.9522	40.8694	32.0318	30.9554	31.4682	25.2675	31.3121	17.3312	24.4427	18.0828	18.0032	14.4268	16.1242	18.1783
10.7293	5.33439	4.84076	3.4586	8.94904	9.93949	5.28662	8.57962	8.66242	8.89809	13.8089	6.4586	8.97452	15.707	13.9682	14.6274	16.6274	17.4968	16.3025	16.8949	26.1115	31.3312	30.8057	38.793	45.9268	52.2834	63.1561	67.8758	65.828	67.1369	71.449	82.0191	69.1433	77.5255	87.0478	88.0796	80.5955	83.3631	78.3567	82.7611	67.0828	67.5828	66.9331	52.7038	43.3312	24.5446	24.7389	25.242	20.0732	18.828
26.4172	20.9013	18.7293	22.5764	19.7389	15.2771	13.707	9.57643	12.449	13.5064	17.9841	20.1815	17.7707	19.5892	21.0701	17.1115	24.0478	23.1146	32.7643	29.0605	36.0318	42.7516	33.0892	33.4045	37.0127	36.8089	48.172	55.9936	52.2452	57.2484	59.1051	51.1879	47.8089	51.7707	50.7516	49.5701	46.828	40.2643	39.3312	27.0318	23.2803	19.4013	23.2516	24.8885	21.6369	17.5127	22.9586	14.7484	10.0287	7.70701
10.6688	7.1879	12.4586	10.0159	6.26752	4.29299	7.87898	6.78025	12.3185	11.6656	10.6115	16.1178	9.27707	7.83439	9.07325	6.5	10.0446	9.71656	11.3535	11.7548	23.0732	17.465	20.9682	19.9363	27.6051	22.4554	34.8726	34.7293	29.1115	28.2229	26.8917	34.879	30.7325	36.2038	32.3376	29.1115	29.7771	26.2484	27.9076	27.2389	19.9873	24.1975	20.2548	19.4841	18.9204	17.6688	21.6306	17.4777	17.9713	14.2261
30.6274	25.5987	23.0159	18.2803	16.3981	18.9522	14.0414	8.44586	13.3344	12.4236	16.3949	16.2516	19.2038	21.242	23.2389	26.1975	25.0828	26.3567	26.9873	27.5032	24.9108	30.9236	32.7834	34.6529	36.4841	39.121	27.879	36.1688	36.7102	39.1051	47.3822	44.0318	48.086	34.9841	40.2898	49.5255	36.5732	24.1115	44.8758	15.4172	28.6497	21.7739	27.293	24.7707	26.9013	26.8822	27.965	30.293	34.3376	39.5287
13.4363	16.9395	13.4809	15.4809	13.9172	15.5159	11.3089	11.914	7.78981	13.6497	10.2611	7.61465	13.7389	7.45541	11.707	8.80892	12.9682	8.23567	6.58599	16.2006	14.1433	16.5573	13.3503	16.0318	16.293	19.7516	27.4236	31.8408	32.4936	43.6465	48.172	50.5605	52.9331	55.3057	71.8599	61.4904	67.3981	69.0446	65.8121	67.8822	71.4554	71.3949	62.2006	68.9554	56.8153	50.2803	56.8471	67.7452	62.5382	67.1465
22.1274	17.4904	16.9968	17.7675	21.5796	11.9045	14.6783	18.5127	15.4395	13.6242	16	15.1688	13.7803	13.4236	14.0605	20.5955	19.3312	11.6146	16.0191	17.6879	21.3599	24.4713	20.328	20.086	21.6306	29.7389	29.5669	40.4682	42.242	49.0701	63.8885	65.1115	67.2102	69.0414	90.3885	87.3217	101.048	110.131	123.067	143.659	154.65	170.229	185.392	189.611	188.08	200.404	213.876	229.041	245.732	262.704
8.85032	11.8885	16.5669	11.6401	14.7293	12.0478	13.0287	6.82803	11.3217	9.97452	11.121	12.0637	8.25478	8.16561	7.75478	8.8949	7.70701	8.3949	13.0478	19.0637	20.8312	50.0446	67.207	94.6242	62.0159	74.9809	92.379	115.245	145.191	119.108	128.369	113.879	125.003	146.248	167.589	163.041	195.592	168.102	223.185	211.732	279.229	376.223	309.739	207.662	269.01	270.207	268.382	356.519	290.962	182.777
19.9904	19.9427	14.6306	16.3535	15.1051	20.9013	19.4395	10.5478	14.3885	10.8439	18.7898	15.7102	22.1338	19.3344	16.4682	20.4809	23.1178	24.8981	24.6529	22.6911	21.6178	27.5255	24.0096	35.3025	36.5701	52.551	51.1879	60.3217	56.465	68.4236	73.5159	76.4013	74.1274	62.1815	59.0287	52.3822	43.9554	34.379	37.3408	35.0318	34.5096	33.8439	32.6879	31.6178	32.4841	43.6242	46.1497	47.6338	42.4172	46.4268
27.0414	26.0223	19.1433	25.0287	21.8503	12.4904	19.914	12.3408	15.914	18.1146	22.7834	20.7484	14.9172	11.7452	13.7771	17.0255	16.8885	18.4363	18.2166	23.4522	27.4395	31.2389	30.6019	38.2452	35.1815	35.4331	31.828	35.0446	35.1529	33.6146	38.3822	38.1242	38.6146	49.3248	60.3535	76.293	75.7675	88.7994	82.3248	49.0191	63.4745	72.7261	82.7739	90.4873	84.1083	90.2643	89.0987	96.5191	87.742	87.0096
18.7261	17.0096	13.2166	16.7293	12.9395	15.1815	10.1497	13.3726	19.051	21.0064	18.9427	14.2134	19.0255	16.9204	13.0796	14.2834	9.69108	12.6178	14.9777	16.7707	12.4586	19.6433	18.9522	12.5096	12.8535	17.4745	16.8089	29.4809	24.2229	26.4427	29.1178	34.0159	37.2994	39.2611	43.0414	45.1592	49.8408	42.4522	57.1783	55.4013	53.6338	60.0223	70.2389	72.1911	69.6783	63.4936	90.6656	63.5987	63.5287	49.5892
21.4873	19.8631	20.086	15.0637	16.828	15.2803	20.5701	26.1879	25.6624	22.9936	32.6401	27.2484	29.5414	24.8599	27.4268	24.4586	30	22.7261	23.172	20.4968	23.949	28.2229	28.328	18.9013	27.3312	24.9299	22.7771	31.242	34.6465	30.9076	37.1433	38.8344	45.3631	50.3408	61.6656	60.8248	77.0446	78.9236	69.8439	67.293	67.3217	75.0096	63.4841	55.6401	53.1847	47.586	37.4108	29.0127	37.8503	24.707
73.2389	70.2229	78.586	115.354	68.6115	39.3917	48.0318	46.9204	23.8312	57.8248	42.4682	51.0223	51.465	72.1115	55.0605	68.7006	46.2006	44.1274	45.7166	54.879	78.0987	44.1115	40.0318	54.7548	54.6465	65.3535	65.2866	63.1529	50.8376	55.621	60.6433	64.2452	67.9713	69.8822	82.1911	82.1975	54.3503	51.7516	40.1274	46.6465	45.1624	42.1752	38.1529	34.5414	42.086	37.2102	38.6752	41.9108	42.8631	53.9841
10.2197	9.59554	10.7771	7.51911	6.9586	3.03185	8.24841	3.29936	5.63376	5.05096	5.87261	5.93312	4.66242	5.02866	3.56369	5.12102	8.80573	7.55732	8.24841	9.06688	11.5159	12.6242	11.6051	13.1783	22.551	25.086	22.5287	26.4299	31.8312	33.4809	32.5796	39.3471	34.3535	41.1369	45.6242	46.7643	44.879	54.965	58.3822	50.0032	55.4459	71.0382	69.9172	77.1656	68.5701	74.5	70.4904	82.2134	60.5605	51.5796
12.3885	13.2484	14.7739	9.71019	11.465	5.72611	6.42038	5.01274	4.70382	4.60191	5.81529	6.39172	5.61465	6.06051	3.88854	6.15924	8.01274	10.2548	8.13694	12.0478	9.46815	15.4108	14.7548	21.3981	18.2102	27.8822	20.4904	21.5987	28.7771	33.3439	39.5924	30.3312	39.4873	50.742	48.5159	55.4013	52.7102	30.2962	43.7261	34.2994	30.7325	30.7516	31.379	26.8726	17.6529	24.758	24.3981	18.2293	30.2389	27.8599
10.0223	7.81529	8.89172	9.26115	8.10828	15.2038	6.40764	13.1847	6.69108	9.55414	7.74204	8.73885	10.9745	8.84713	10.949	10.2834	11.3631	8.55732	9.16242	15.4841	13.0318	17.3631	14.7484	17.5191	19.1752	16.9841	15.1561	20.3408	26.121	17.8408	22.172	22.5764	27.3949	29.1815	31.1433	31.5255	30.3408	26.3885	30.2357	34.3408	33.7357	37.5924	39.3822	33.8854	30.7516	30.9204	33.4299	35.7994	38.8439	40.0701
13.3631	16.2452	12.4682	19.5064	27.5032	22.6752	15.6911	12.086	9.30255	10.3439	9.04459	10.8694	12.5159	6.85987	12.6369	12.9045	12.2834	13.9586	24.0669	20.1115	21.3057	23.0223	26.9936	21.7006	20.8917	21.6242	20.8535	19.051	21.3217	18.7611	21.8439	25.3439	33.1401	27.5	34.621	33.9108	33.1115	29.7611	43.2325	35.1879	31.8854	39.6401	50.1433	57.6083	57.7898	52.4236	46.1019	54.5096	42.449	34.8854
22.2038	16.2293	14.6975	21.0573	20.4236	13.0478	16.6943	14.6369	21.1688	33.1592	30.2197	30.5987	40.1497	27.7389	27.3312	22.6465	25.7866	35.8312	26.293	26.6369	27.3694	22.828	25.9618	28.293	31.293	26.7803	33.4682	33.6401	34.4108	40.0127	34.4745	38.4586	32.1624	34.7197	39.1656	41.0478	63.1911	83.7962	70.8599	83.4936	58.5318	52.0064	59.4363	54.258	50.6911	46.8217	40.8408	37.949	36.7134	34.7771
19.3662	15.1656	16.4427	11.707	10.465	7.52548	9.51911	11.6975	13.5701	7.30573	9.02548	7.72293	8.47134	8.3121	7.26752	13.1497	15.1465	13.3981	16.7739	23.9586	25.6306	33.9904	26.4204	35.5987	46.0796	59.3599	67.3854	68.4236	73.965	71.8153	72.3949	79.3599	77.5064	62.9873	63.1911	62.965	71.4395	81.6624	84.0191	80.9873	81.6433	103.401	111.783	106.022	114.226	121.443	113.713	124.105	131.121	115.385
36.4841	23.1879	19.879	28.1561	25.2643	13.6592	5.54777	10.2452	12.0096	13.7452	13.242	7.40127	13.8408	11.3535	11.4013	15.4713	19.7197	22.8503	20.0605	34.086	40.0541	45.5955	42.2739	57.8885	57.7293	71.4777	64.3885	76.8854	76.4459	87.242	95.1242	89.8694	91.6242	102.513	104.261	119.707	119.376	125.959	124.436	130.478	151.277	146.803	150.854	150.882	156.685	172.672	173.373	161.115	142.901	140.162
23.414	17.8885	13.4586	17.4682	19.8599	15.5318	26.3025	23.7325	20.4363	20.8567	21.121	25.879	25.5541	28.6146	24.6497	28.1529	27.6529	27.6338	35.3726	36.7261	34.9713	52.6465	49.8376	60.1083	51.9045	72.7357	69.6656	77.6083	81.7357	81.9268	94.4904	98.7389	88.5573	102.889	104.108	104.911	100.917	104.309	98.8917	95.7739	103.901	106.876	105.624	108.863	102.873	107.939	100.535	112.678	93.4745	101.271
59.7484	56.8981	51.5255	52.2962	42.5573	40.4013	27.3726	22.7898	29.6624	23.7611	26.7834	27.1115	29.4331	23.8567	25.2261	28.8408	34.2739	41.2962	39.5159	38.2866	49.0605	52.9204	54.6656	59.4777	68.172	75.5605	76.8312	84.2197	90.172	86.4809	92.2357	98.9682	85.4713	88.7102	78.879	89.0573	82.1911	72.5191	68.4713	71.9013	63.7898	68.4968	67.1815	69.6752	84.5	75.1146	78.1019	81.2834	74.8631	73.0541
30.9363	24.2994	26.0478	24.6178	23.9236	20.0924	17.707	21.949	19.6624	21.5987	17.6083	21.2866	18.2261	12.7994	20.0796	12.2389	19.0987	23.2134	25.7102	27.1115	29.4076	34.9013	37.7389	47.828	47.1847	47.4586	54.3408	56.4013	58.949	65.6688	66.207	71.6338	84.1051	77.2994	90.8344	92.2484	96.4172	95.6178	99.8917	106.796	99.414	103.057	110.669	97.7038	93.6242	87.3758	88.6178	92.3312	85.1146	87.5159
33.4586	40.8662	31.5446	24.7739	26.0605	13.3662	20.8694	23.3185	17.7452	20.172	21.6815	18.8758	19.1656	17.8854	22.8503	22.4841	33.7166	26.4554	36.3248	39.7611	36.0828	43.3312	59.828	70.8248	63.8344	76.2038	83.0096	99.5318	105.299	111.901	114.726	118.567	128.022	113.067	114.783	97.3089	85.3662	72.2325	56.9108	53.7197	39.879	35.6401	31.0382	31.414	38.4363	36.672	34.4395	33.2994	31.5223	36.5987
77.8694	72.4427	67.4873	64.3408	163.471	65.6752	60.5637	78.5127	79.4682	89.1752	90.2006	87.8408	86.3408	73.1306	71.6911	90.9841	111.758	80.4904	148.968	71.8726	82.3567	85.914	79.7994	67.3949	69.7548	61.3599	61.5382	66.5732	104.096	139.315	82.0637	136.669	406.624	491.252	402.611	402.694	215.516	189.841	166.42	66.9713	73.0541	128.764	146.678	50.0669	52.6529	45.0669	53.3662	44.707	52.2389	89.1847
89.2994	85.1624	87.8025	80.2484	87.9459	89.5987	90.0987	80.0096	88.4268	90.5796	110.452	92.0987	86.8217	85.2643	71.2134	70.4395	71.5764	73.6178	64.2675	73.5764	65.8217	60.3662	61.1943	56.3917	66.5669	63.7325	62.7261	60.1561	58.3917	50.7516	65.5955	57.8217	62.8949	78.9299	89.6338	90.8025	84.2293	99.3503	102.685	104.134	100.659	101.086	110.847	113.58	99.5987	120.78	131.188	164.436	172.025	166.204
25.551	19.4427	12.914	16.2325	15.586	7.8758	19.0924	10.379	12.086	10.3344	12.051	17.9236	16.4268	13.3153	11.4841	10.9904	18.9618	18.2197	17.3121	16.5414	16.2866	14.0287	11.4777	17.1497	14.5191	21.2357	16.0987	18.9936	18.0064	23.7516	21.4204	31.2197	33.7803	40.7548	43.8631	52.8057	50.5446	55.5764	52.9554	54.8153	72.551	88.449	88.2739	91.6465	99.6019	102.424	112.946	126.338	132.006	135.92
12.3854	14.1783	10.0127	10.3376	9.00637	8.50318	6.34395	11.7293	11.035	11.3471	15.2866	19.051	14.2516	18.6465	24.7261	19.3057	37.6656	26.9554	18.6338	28.6274	32.7834	36.7229	37.8758	41.0446	40.9682	46.8981	45.2771	58.3981	60.8344	63.7548	59.8854	69.5637	80.4777	69.1815	61.9904	59.4268	60.0064	61.6178	59.4172	63.3694	63.7898	64.1943	65.6465	78.6847	95.1911	90.8758	95.3726	104.048	112.545	104.535
5.83439	5.79936	4.01592	6.33121	2.60828	7.07643	1.6051	2.5828	7.74841	4.12102	3.73248	2.19745	5.56369	4.07962	4.10828	1.36943	6.42994	3.52229	4.63057	2.08599	4.07325	5.33758	6.42357	6.07006	7.94904	14.828	15.8312	23.8758	27.0573	30.0573	30.0669	29.3089	35.3344	45.3471	52.6338	72.9873	77.2548	81.742	94.9713	105.538	111.994	106.576	110.07	132.398	118.102	119.446	116.688	110.43	117.121	104.51
41.0127	39.7548	33.7803	32.3248	35.6401	17.8025	30.5669	29.5955	28.3439	35.3631	22.949	29.8726	33.5255	30.0892	30.6624	29.8981	46.293	43.2166	47.3885	59.7134	57.6975	74.6656	86.0605	96.4586	95.1465	110.35	105.229	115.783	115.449	109.21	111.653	113.729	115.685	114.513	114.143	117.51	105.43	112.226	121.169	105.927	118.726	130.815	116.841	121.315	116.838	118.162	120.354	110.041	114.723	128.146
88.8217	83.6274	84.7739	82.8885	74.8949	73.2898	74.3057	74.5955	91.4363	83.6975	214.471	97.5955	139.226	118.984	81.6847	70.5096	96.3599	107.726	94.1338	95.3599	105.178	96.3726	103.048	104.048	102.631	107.516	126.908	123.162	134.949	129.927	123.965	134.516	149.086	159.076	171.51	178.541	161.427	178.787	191.892	207.035	221.293	216.111	229.334	244.395	261.646	281.207	323.389	310.408	347.35	381.803
5.61783	5.3949	5.50955	8.41083	8.32166	7.10191	6.43949	2.56369	5.32166	3.87261	3.70701	5.47452	6.79618	8.98089	6.45541	8.32803	18.828	20.6975	29.2548	23.5955	36.8185	55.8217	45.2994	52.5064	64.9013	69.1815	78.3981	76.3185	78.8503	78.9586	67.6592	69.3121	59.4809	70.7771	58.3439	69.6083	77.2389	78.1051	84.5382	75.7994	86.6688	79.8981	83.7707	74.7357	84.7006	76.1083	70.9331	73.3089	74.3089	69.4299
7.28344	6.83758	6.99363	4.62102	5.79936	5.20382	12.2548	9.94904	5.79936	6.29936	2.51592	4.00955	6.69427	2.9586	5.09873	8.03185	3.59236	6.03822	8.07006	10.9777	15.2739	10.6592	14.1338	15.2484	24.5255	24.4204	17.6529	12.6369	13.0955	13.2739	10.9809	6.56369	8.36943	9.26433	13.6561	15.4777	14.6083	11.672	9.36624	8.67197	13.3694	14.8854	16.0573	20.9618	16.8185	16.7803	20.4076	17.4904	12.0605	16.7675
2.77389	2.23567	4.20382	3.7293	4.5828	10.9586	6.11465	2.55414	1.83439	1.75796	3.15605	2.49682	2.14968	2.97134	1.76115	3.22611	1.59873	2.78344	2.17516	1.25796	1.27389	1.63376	1.6051	1.93631	5.10828	4.38217	4.42038	5.24522	4.63694	3.97452	3.74204	9.13376	8.49045	10.9936	15.6688	22.1975	27.7166	28.3089	31.9873	32.1115	43.7771	61.3567	54.6815	59.4713	64.7516	56.7516	65.0732	65.9045	62.5573	66.5127
6.09236	4.35032	5.48726	5.43312	6.9586	6.17834	5.39172	4.01274	4.96497	5.6242	6.56688	3.74841	1.71338	4.42357	1.73567	2.28025	3.22293	1.97134	4.43631	4.62102	2.34713	5.53503	5.77389	4.29299	2.94586	6.64331	5.37898	8.91401	9.51911	12.6338	7.98408	3.98408	10.3567	10.9936	11.4618	15.3726	13.8822	16.7229	18.6338	18.9204	19.3567	22.7834	23.9363	28.3662	21.9841	26.5223	19.2134	27.0382	19.9936	16.4904
28.8408	24.3917	24.2866	26.914	22.5478	16.3694	19.7197	13.8599	18.9363	16.879	24.6497	31.5318	28.7038	28.8567	20.5064	31.7261	31.621	38.9745	42.5732	33.6146	36.9745	32.6624	39.1879	36.5446	35.9777	34.9618	46.7707	54.4873	43.0127	49.2994	68.4968	57.8758	53.5191	58.8408	47.1433	79.0637	62.1688	78.8599	71.0924	53.0191	55.051	54.7643	43.8248	58.1433	49.7643	47.1592	49.8057	40.7166	32.7803	33.0573
24.7675	19.5573	17.379	18.8917	14.8344	10.6815	7.96497	9.45223	15.2038	14.4873	11.6465	13.4522	16.3631	15.8185	13.3344	15.5223	15.3949	11.4554	16.7325	17.8726	17.5127	18.1242	17.1274	21.1624	15.828	13.5955	24.6783	27.1242	19.4554	17.758	10.2325	22.1051	40.5318	31.4204	32.0159	18.7898	24.4108	26.8981	28.8949	22.5191	22.3439	21.672	31.3376	24.5096	18.0573	15.5764	19.1465	14.8885	21.5446	25.4904
82.2962	80.0605	74.8694	81.3981	84.7803	83.4108	93.0446	99.6242	97.8121	89.8885	80.4076	88.2006	94.9968	93.4172	91.4904	86.1433	82.2898	74.9841	77.051	80.2994	70.242	65.0287	71.4936	74.1561	73.5191	77.2771	80.6815	83.5955	83.6083	85.2707	86.0032	95.9522	89.4586	91.6911	86.7994	80.0987	91.7102	95.2261	97.7803	104.194	111.156	119.863	126.726	141.045	141.022	163.643	166.338	186.838	184.675	204.07
23.0892	12.2357	10.7261	9.68471	7.29618	5.78662	4.30255	10	5.10828	7.2707	9.42994	5.56688	9.20701	7.53185	11.3917	12.3121	12	15.793	16.1242	19.672	22.5987	21.5605	20.7611	23.1752	24.0191	24.2707	28.6338	22.7994	22.1433	23.6847	16.3662	25.0732	26.4268	39.7962	44.0987	42.8694	50.2643	62.8408	57.7516	51.0255	49.6752	49.2707	60.258	53.0605	58.1879	57.328	56.7962	56.1146	62.3503	67.379
122.057	111.131	109.615	105.019	101.038	88.8885	99.2866	99.8854	91.3153	75.3217	92.9586	102.096	87.1943	85.449	85.0064	90.9331	85.3344	91.4586	100.019	112.844	103.812	108.545	113.178	122.707	119.57	125.061	131.032	147.631	130.127	129.022	134.732	127.592	135	138.736	143.522	145.357	131.465	142.322	156.631	153.115	155.242	144.583	157.742	152.404	149.758	138.08	137.376	137.194	137.389	131.764
17.5732	13.8726	18.0287	9.51274	12.5287	5.82484	10.1274	13.4618	9.75478	7.85669	5.61146	7.97771	15.2261	13.1592	9.6242	17.0255	22.1497	17.1019	15.3121	22.0446	25.2516	25.0478	30.8758	23.535	19.3726	28.2803	24.1306	22.4522	16.7898	21.9873	24.6847	23.535	25.5541	29.9841	34.8376	28.6815	31.2102	22.7675	25.5064	26.1783	24.6688	30.1529	24.7484	31.2006	28.8599	25.9904	22.258	20.586	35.7548	54.5892
82.4045	83.2962	81.1465	83.2739	84.3471	93.2803	83.2994	85.5064	95.8885	90.7357	95.2643	91.9618	98.8885	101.022	112.841	115.564	108.105	107.748	100.608	93.5255	80.1975	64.2611	65.3694	56	41.7357	40.2866	29.2134	40.2484	18.1306	23.6465	26.3822	27.9713	30.8185	23.1178	29.8376	43.3758	53.6369	61.551	75.5127	92.1051	100.118	106.478	106.29	104.815	95.0828	93.1529	98.2102	94.9873	96.5287	110.309
18.4968	17.6592	11.9045	16.7006	11.1529	11.4968	10.3599	5.96497	7.39172	10.051	9.42038	9.9172	14.3917	12.7548	17.965	21.0127	24.7038	17.172	22.4809	26.3662	20.4363	14.3726	17.9522	14.0032	13.0446	18.8153	22.6529	19.672	22.1656	25.9172	29.8599	37.4108	36.1911	48.0669	37.9713	29.172	35.0255	31.4936	29.9682	19.4777	27.4841	25.0573	30.9268	21.5701	27.5541	17.0478	17.0223	20.7102	24.1911	20.6975
138.713	136.299	143.602	143.061	143.354	136.223	135.006	141.806	149.213	138.933	129.497	139.971	147.369	147.653	136.354	172.185	136.417	152.099	164.424	135.736	130.882	125.083	123.662	121.191	117.408	117.704	126.799	121.013	110.564	115.723	124.519	121.354	121.032	110.277	119.111	109.901	108.153	97.1624	86.8567	75.3089	68.5987	62.2898	57.8854	53.9013	57.9522	52.0287	56.3025	54.0032	57.3089	57.121
107.258	113.389	98.9395	95.3057	81.0414	71.586	72.4841	81.8726	77.6656	82.8949	72.8694	60.2325	72.0828	55.8344	55.551	52.0064	70.3153	74.0191	78.7134	72.4236	63.3917	64.8471	65.6847	77.5478	78.3217	87.2994	96.4936	98.8758	113.911	120.481	128.506	134.217	133.146	107.013	144.662	186.159	158.717	174.092	152.755	134.223	127.729	126.022	119.729	118.745	117.064	108.067	106.404	110.404	99.9268	111.618
14.4809	10.2962	5.57962	8.21975	13.6115	10.0573	15.7389	14.8694	10.2197	5.85987	6.51274	10.2166	14.6561	17.6306	12.5892	18.2675	24.9013	23.9045	26.2357	31.0127	45.3217	39.8344	45.8503	49.0924	53.7611	57.1783	59.8121	66.2038	57.4745	52.586	56.0255	42.9682	41.4777	33.9522	38.4395	36.4586	22.793	21.7516	24.414	14.2229	20.3471	15.1847	22.8312	20.6815	24.9045	31.4936	19.7261	23.6369	25.7166	17.207
83.0223	73.2325	70.4522	49.3599	60.1943	51.8535	57.8535	52.4076	58.3408	63.9841	55.3854	59.258	65.8567	59.9427	58.465	60.7166	63.7197	77.3025	79.5064	76.7898	85.2484	89.0764	98.0191	108.621	116.175	114.968	128.398	135.449	143.019	131.704	134.857	124.411	128.369	121.793	116.038	130.134	120.424	113.631	129.029	132.354	135.013	147.503	147.487	159.955	164.146	163.392	168.468	162.217	153.296	149.064
256.631	239.022	247.561	246.105	223.373	241.153	295.051	248.417	326.057	324.717	321.567	320.025	306.115	303.395	269.487	278.589	271.092	266.057	273.124	283.092	270.392	268.854	273.293	277.51	294.608	280.376	309.016	312.21	308.08	314.162	315.697	327.28	331.293	329.264	327.955	289.487	270.627	255.701	255.006	251.443	221.777	214.936	194.172	207.955	182.831	182.21	188.978	185.379	170.774	174.424
20.1274	17.5255	16.742	13.5955	9.67197	13.6752	12.7611	8.83439	14.4586	14.0255	11.1083	19.0064	19.3917	18.4045	9.19108	13.0414	16.5732	20.4331	21.4745	20.2803	22.9682	21.6306	24.4586	26.0159	31.051	28.2739	27.1242	32.5478	33.1847	29.5096	25.5796	32.965	28.1433	18.9172	26.1847	29.3599	26.828	26.8885	35.5796	35.6688	56.5096	46.0987	29.0541	17.1561	14.1752	13.4554	11.5955	10.1242	12.9045	7.06688
74.6911	59.5	58.7134	53.5064	38.7707	47.051	43.8344	37.258	43.2389	38.4745	42.4299	44.0255	44.2675	45.965	41.7834	48.5541	41.0191	43.3503	46.8662	51.3344	60.6242	58.8662	59.9045	65.914	74.9873	74.449	83.2484	101.656	115.315	117.038	116.834	125.927	109.557	112.232	110.675	119.287	124.535	115.783	116.006	123.65	124.949	106.111	121.252	125.608	118.777	102.392	93.3057	82.3025	80.7261	80.9427
74.2771	62.6433	61.0924	58.4745	50.1146	48.8312	40.586	50.2452	44.0605	36.5732	74.5318	66.7898	59.2134	50.6051	37.7006	41.4363	37.4777	38.914	55.3376	70.3662	62.8217	64.8599	50.2898	55.1783	61.5764	56.086	62.3408	69.5287	63.9522	61.9076	69.1783	66.0382	61.6401	65.6465	67.7229	73.8153	67.8885	73.242	62.3153	61.7803	70.5318	64.2484	73.5764	81.2962	84.758	90.0223	104.697	117.102	121.777	124.038
109.758	95.6975	98.8599	82.8248	78.4363	70.3567	82.1561	81.3567	72.7771	59.3503	64.8248	64.9522	63.9745	61.6274	60.6146	65.7611	61.0828	54.2261	59.914	52.6401	66.8567	66.9809	61.0255	65.2357	63.4236	64.7357	76.6019	70.0987	83.1306	77.5669	83.4299	89.0223	73.742	74.6465	80.6242	84.7325	90.2102	94.293	104.624	112.659	123.019	134.803	131.172	136.153	142.029	128.404	134.086	132.723	145.551	155.392
157.503	150.49	160.382	163.713	156.328	155.892	183.424	166.067	189.65	183.338	185.322	192.296	203.513	204.669	203.427	222.783	209.576	230.86	227.245	244.146	246.962	250.567	261.79	268.844	286.331	291.146	285.258	299.28	333.908	322.452	328.739	331.984	318.92	334.825	326.611	307.373	292.401	268.86	252.685	234.669	196.083	194.264	172.545	163.045	153.178	147.895	151.825	146.411	150.258	156.344
180.185	181.742	186.261	202.637	212.076	189.939	185.691	171.341	186.841	182.073	165.898	176.449	149.274	151.924	148.806	149.051	158.258	158.825	155.099	175.366	174.28	165.952	191.354	194.551	162.831	234.79	140.025	196.417	224.955	198.92	184.293	232.21	238.175	235.911	225.506	241.484	253.771	256.739	258.959	266.108	269.449	279.889	271.729	296.019	319.573	318.373	316.908	336.64	329.627	339.468
146.385	139.041	142.459	140.863	146.105	125.621	135.933	151.656	117.032	121.694	128.475	123.261	122.799	123.535	139.825	149.455	144.131	145.758	137.236	140.299	142.347	138.793	134.134	146.968	165.102	167.341	172.232	190.723	207.076	204.01	183.156	184.067	199.557	185.882	191.825	188.334	190.691	188.701	191.01	177.78	156.334	161.917	149.102	149.532	146.395	152.344	147.369	151.041	145.099	154.115
140.006	148.519	157.201	167.898	153.669	134.022	157.525	171.242	169.217	153.659	158.481	177.121	179.78	176.624	167.334	150.752	161.58	139.051	126.997	137.462	135.452	142.411	137.296	123.178	131.36	131.745	128.245	130.115	133.194	133.475	124.051	126.459	125.567	130.92	129.169	135.669	153.22	167.312	181.726	182.086	189.981	192.061	194.478	196.624	188.306	181.736	192.793	198.758	190.86	193.834
36.2675	37.4045	27.8344	27.8758	18.9809	15.1624	17.7898	26.0096	27.9395	32.258	52.1624	35.0159	35.7548	22.0223	16.7866	21.1783	23.7357	17.0701	15.8344	17.8631	25.6146	14.4936	19.1242	10.3057	14.465	10.035	11.1561	10.5064	11.5796	9.94586	17.207	12.8312	7.8758	13.8981	10.1624	7.21656	11.4108	13.8694	13.7675	15.5287	15.0573	14.9427	18.6019	23.3599	18.7739	25.0159	16.0382	31.9045	23.3408	30.4904
46.7006	43.4045	40.0191	48.328	43.5064	31.9873	31.9713	22.207	26.2229	28.5955	29.6497	29.7006	36.9331	30.1051	39.4013	32.5478	42.8185	41.5478	31.0955	29.1338	34.4841	49.3885	70.9777	58.2134	50.9013	39.3726	37.9809	32.914	30.3758	24.9586	21.7261	22.4904	27.2261	21.8822	16.8854	16.0223	27.2484	22.0732	23.6178	18.758	29.5032	33.0255	28.3025	27.1656	31.4873	31.6815	33.5955	38.0796	28.9204	34.1561
20.0159	16.4745	13.5764	16.0573	19.3185	15.914	17.4809	11.8599	12.7516	12.9076	15.0732	8.50637	11.2357	16.7866	10.9936	26.4427	43.0223	44.7675	43.2994	27.4013	22.4522	21.2962	9.20064	17.1274	16.6051	18.4586	17.8567	19.0414	13.0828	17.4809	22.6115	14.3726	23.9395	22.0732	22.1592	20.4045	15.0987	25.5669	27.879	26.8439	29.3057	35.6465	31.4809	30.7102	31.8153	28.4745	33.5955	29.3726	28.9873	30.3376
51.6242	48.6083	44.4268	30.5732	23.9713	18.9682	18.4554	17.4395	15.8344	13.7325	14.449	14.8312	16.8917	14.0796	10.3439	20.3376	31.0541	23.0287	17.7611	31.1146	30.3089	19.6401	23.4713	16.535	17.1911	16.5987	18.3758	19.9904	20.9459	14.7261	14.6401	12.3599	13.8662	19.0573	22.9809	21.9268	17.9363	24.6783	21.7771	30.0987	24.7803	27.7389	24.5924	27.5255	32.3121	30.5287	33.4713	31.0796	24.6656	30.1306
163.328	180.481	172.85	175.401	174.917	148.264	234.656	252.318	208.331	175.627	280.605	234.455	224.064	220.449	207.366	224.831	224.701	214.446	221.417	248.29	261.917	187.914	196.363	192.376	194.838	203.879	195.424	207.28	200.713	218.882	196.777	193.72	190.029	197.599	192.086	185.271	169.876	170.981	166.873	169.255	164.041	187.258	184.723	179.089	177.863	182.172	180.803	186.156	195.07	198.041
51.0414	46.8758	48.4268	40.3535	34.4873	25.3185	22.6019	19.0892	25.4682	26.9013	19.8535	20.2516	23.6115	22.8885	32.9299	34.207	29.7675	26.2739	33.8344	36.6656	34.3949	24.5159	33.0605	28.9076	35.5924	40.7771	40.7293	45.5127	52.9682	64.2994	67.8631	76.2548	83.4522	87.2834	95.1497	90.7293	103.025	112.003	124.72	136.465	127.57	144.529	145.541	155.487	174.761	180.943	174.688	183.408	185.745	198.191
65.1561	64.3854	51.8694	56.1465	52.1465	39.3662	44.8854	56.2834	51.7898	50.8758	68.1783	58.2102	50.5796	51.2803	44.9459	54.2739	57.8153	47.9968	57.2452	57.5701	64.8949	68.9076	66.2102	71.8408	82.2675	86.1051	87.0191	90.7006	106.038	103.366	103.299	122.439	124.65	124.283	132.025	128.602	132.006	148.016	147.669	144.239	133.268	126.643	175.882	144.92	153.315	116.411	99.4618	87.0637	76.4904	90.0223
96.8694	94.2357	92.8376	105.28	118.656	106.895	103.873	100.341	116.965	126.742	126.914	136.051	124.293	142.191	158.459	157.914	153.904	161.643	174.341	173.404	176.71	179.538	193.108	183.481	178.325	177.191	174.513	157.548	170.57	161.586	144.01	149.748	131.834	123.987	115.404	105.08	95.8885	87.6369	86.4459	83.6561	79.1083	74.2516	75.5255	73.4076	79.2006	73.4204	88.9745	80.9745	70.7962	64.5191
36.1401	41.9268	35.6783	40.9331	34.4108	39.1752	48.0287	43.0796	43.9809	74.5255	48.914	75.8312	58.7293	62.6369	41.5223	39.1115	29.949	29.6879	22.8153	17.7707	24.1847	17.258	23.1592	20.2229	18.9618	13.5064	12.2898	16.0732	15.5382	16.0892	15.0573	29.2739	21.7962	28.5032	22.7611	21.0573	27.6847	36.9427	37.7325	28.9268	36.4299	39.6051	44.0669	38.6146	41.8217	52.5191	51.4777	46.949	32.0605	39.4745
46.7994	52.3185	48.7739	57.5032	43.7771	44.1178	39.1051	50.5382	50.5287	47.5287	48.6815	56.9682	56.3726	62.4618	58.6242	73.3503	78.1975	101.631	69.4363	98.4713	78.449	90.5701	75.3344	62.3535	72.449	63.6847	73.7102	67.8981	80.2771	77.8185	82.3185	88.2197	90.5223	108.828	103.608	100.318	95.172	96.5732	91.6752	90.9936	75.5637	80.7994	82.1019	86.5064	83.7325	78.9076	88.2134	89.7611	66.9108	62.7166
33.2038	32.3599	26.5892	19.9299	19.9013	15.8471	17.0064	22.5955	23.9841	27.8376	37.7166	24.7898	19.3153	30.4172	20.9841	10.8057	27.0127	32.2643	32.8694	21.1943	38.5159	33.9873	39.4427	34.2452	31.8153	21.1274	29.9172	38.7102	26.4204	49.9299	26.5955	46.1497	37.9618	38.0637	33.4904	49.0669	40.3503	51.3854	50.086	44.6242	45.3981	47.4586	43.9554	43.2803	38.6815	36.5637	40.8185	42.7357	40.2006	40.4809
109.392	135.723	124.443	127.239	127.255	126.51	129.01	130.901	124.268	119.045	123.436	119.016	108.462	113.576	96.1943	89.2134	91.6879	97.7261	102.398	107.283	104.538	108.143	104.427	90.5541	83.6019	83.2516	98.3503	94.1783	90.1115	89.3981	95.1083	113.857	120.561	131.366	124.115	94.0414	124.812	112.975	99.2134	106.465	107.538	112.159	100.79	108.825	109.105	119.191	126.067	146.268	122.713	146.121
86.7707	89.2866	73.8503	75.4936	68.4713	52.0955	50.1433	40.672	41.4268	29.8121	34.2643	24.7261	28.6783	20.9236	22.2707	21.6943	25.7834	21.7834	28.0127	35.7229	52.0096	54.8726	55.1338	44.6688	31.465	29.1529	24.2516	20.1783	23.2803	24.4363	23.0541	31.828	36.2611	73.4395	78.3248	62.4554	64.3949	57.9873	51.6465	41.3631	29.7229	38.0955	28.328	26.5414	31.4108	32.2102	34.6433	32.4331	24.9331	27.7357
49.5096	45.7516	38.3439	49.9745	47.3057	31.1529	29.4618	53.1943	41.5478	48.5637	30.0191	20.9809	17.2229	19.9968	21.5382	26.1975	22.0987	21.5828	19.6752	23.2739	20.293	30.9045	36.1178	29.8248	22.8217	19.4268	24.4076	27.6433	28.5541	17.0987	18.2261	16.4076	23.0382	17.0605	22.2962	22.949	22.121	20.2643	23.8822	27.6847	27.6943	34.4108	32.1879	32.4586	38.2293	34.1051	39.3854	39.4331	44.4777	35.0669
42.2739	36.7643	40.949	35.465	33.6783	22.0032	21.0191	22.8121	33.3025	20.3758	25.0732	21.6306	28.4904	22.2994	27.9873	25.707	21.6083	25.5318	36.6497	43.6943	46.1242	35.9172	41.6752	40.7898	37.8217	28.2166	28.1242	33.035	34.5764	34.9045	32.8694	32.7962	34.449	40.5223	38.5955	45.4554	39.5637	38.7197	47.5414	34.242	39.1975	35.2038	43.0796	72.6529	62.9777	54.8025	56.6815	67.414	62.5732	52.6433
48.5732	58.3822	49.1465	38.121	43.3376	33.5828	42.949	34.6592	38.3949	38.2197	38.9873	37.0478	48.7803	65.2006	63.1083	62.3344	58.8599	47.9904	52.2229	66.6369	62.1656	96.535	84.0382	45.0669	66.0892	46.3471	62.5732	91.5191	76.8981	129.427	176.086	149.252	130.739	127.535	177.726	109.994	140.608	130.188	96.5159	86.1369	64.6497	95.6561	41.4745	53.5478	49.5191	58.8758	48.242	44.9363	60.879	27.6178
20.0701	18.6433	10.3599	17.1497	17.6879	20.1115	34.7994	23.4873	18.9076	16.5159	20.1783	43.8599	23.9076	29.2675	22.7771	19.2261	26.8885	28.0669	31.5159	35.0382	25.9682	32.9013	38.5701	41.2325	39.6529	47.1656	53.6242	55.8376	57.8567	49.3503	40.0255	41.9586	46.5701	55.207	69.7994	80.2293	65.9873	63.0732	68.207	63.242	62.6879	57.3057	59.949	55.0987	52.3917	56.6561	49.4076	52.9395	47.7548	52.7771
23.4745	21.5573	21.4841	17.5159	18.2006	18.793	13.6497	10.7548	17.035	14.6783	12.242	13.5255	12.3217	20.2611	17.9204	20.0127	23.9682	24.5924	32.035	25.1847	33.1019	38.6083	33.3408	39.5127	34.2834	33.5701	40.3567	44.2166	47.9459	59.7452	63.8121	70.4459	68.0032	74.9108	62.3726	68.742	79.6911	68.1401	69.9809	61.0191	56.5669	50.0732	51.7325	80.9873	69.7166	70.0828	42.5064	38.086	29.0892	31.7548
120.322	90.6497	80.1656	83.4204	102.252	99.793	67.3599	70.5414	69.0892	69.4522	67.0701	67.8726	64.1592	63.7962	63.6752	72.8089	74.7643	72.6752	72.3185	83.1688	88.9841	103.946	97.4745	106.019	110.083	101.653	105.615	92.0892	99.7962	94.3376	95.4395	95.3694	107.229	94.5987	92.0732	97.6338	109.35	121.882	119.513	124.904	132.669	136.357	143.841	153.169	161.248	160.217	170.889	159.646	162.697	174.497
114.296	106.78	104.067	91.3344	95.2293	99.4427	88.2357	94.551	88.1051	90	90.1688	85.1497	92.8217	85.2357	97.1815	103.732	109.439	113.946	157.768	173.086	162.105	132.99	137.634	150.334	161.322	147.525	163.411	163.013	181.153	181.685	176.65	177.379	164.854	172.834	167.108	154.545	156.637	144.185	152.697	148.341	136.889	132.083	162.239	172.65	180.328	182.818	165.793	180.178	168.159	164.554
47.035	44.2548	39.1338	47.3153	38.3917	49.758	41.9682	32.6465	41.1783	42.7898	44.2389	46.3503	49.0255	66.707	66.2516	69.293	58.5127	43.8599	33.1943	57.7006	39.3662	41.5701	31.5573	37.6879	37.8949	31.3344	34.0637	23.5127	22.1656	32.7994	34.3726	53.0796	48.2357	119.869	142.952	74.2994	58.9841	54.9268	44.1465	55.2898	49.8535	46.6497	61.7293	55.7516	63.5159	61.9076	53.4363	60.2707	57.3185	53.3822
48.0987	31.6975	35.742	33.1592	28.3217	25.5637	22.086	24.051	28.3949	38.1465	38.0032	31.4618	23.3758	14.9045	31.7771	31.0955	25.2803	15.8694	12.0605	9.90446	10.7452	18.328	14.0764	23.7452	24.5764	36.0605	32.2548	42.086	42.5828	37.9554	51.2389	50.0159	49.6656	47.4586	63.7771	49.086	56.6879	61.2548	61.8535	118.025	55.1497	54.0159	63.9013	64.965	42.2293	46.6529	57.6911	61.535	68.9236	78.3854
182.503	169.71	174.576	185.564	164.586	164.876	174.124	165.242	156.127	173.825	166.911	161.519	154.732	178.248	166.822	170.462	179.468	190.293	188.605	206.834	203.583	207.939	211.643	223.076	219.322	220.344	243.92	241.911	251.615	262.067	296.911	212.717	219.529	137.131	166.841	137.777	121.573	186.892	158.834	170.258	154.57	148.758	154.315	156.682	133.771	137.446	146.309	153.363	151.516	150.857
38.9331	49.1688	42.2803	39.9809	32.6656	24.3662	29.4554	33.9076	30.9236	46.2771	50.9427	50.8408	46.6911	45.8153	43.121	29.1083	41.8025	45.0255	46.3121	49.8535	48.5255	63.0382	64.9236	81.4713	85.0032	88.9713	82.0669	88.9013	92.3057	97.7452	101.162	138.688	110.306	79.9554	70.7643	71.1911	71.9076	59.6847	58.1019	59.9522	45.7803	34.0796	41.2516	44.9236	33.2994	23.6847	38.5987	44.9427	41.7866	36.535
32.2197	25.6688	21.5223	22.4936	24.2739	16.7261	18.6178	14.1879	13.1911	23.6019	31.7548	20.742	21.2261	28.0478	26.9299	23.7261	25.3185	45.0637	53.6783	48.9236	46.9809	65.2675	61.4713	72.535	87.051	92.1146	98.2643	118.519	115.003	102.666	111.025	111.389	101.185	122.615	106.194	111.529	81.6433	85.1911	70.2834	98.1975	84.6624	65.2611	63.1051	60.8344	40.449	36.1083	25.0032	29.3344	38.4586	45.3153
79.0796	69.793	67.3662	70.6433	59	46.9618	38.6911	44.6975	43.5	53.4873	61.0096	45.0255	54.8057	38.8567	37.8694	42.9268	44.4904	49.3662	45.4204	48.6019	51.793	72.7229	61.5191	67.4459	53.6911	71.2038	85.6083	104.239	107.834	116.812	120.086	129.968	135.85	162.672	158.325	165.118	140.207	56.1115	28.6306	107.111	115.271	124.51	98.828	72.4172	57.0701	57.5064	44.9904	40.4904	34.8535	36.1592
62.5414	58.5669	51.2962	57.1624	40.2898	40.6561	39.4936	23.586	40.2102	41.3503	50.3822	47.1051	53.8822	62.2102	48.8057	52.9076	53.8854	48.1465	55.8057	64.1561	71.5924	60.086	56.1561	50.7707	63.3089	69.2325	60.7643	68.8662	82.2134	96.207	88.7898	99.8917	94.0127	106.29	100.557	106.825	109.742	106.076	93.4331	107.742	103.713	102.949	104.296	107.07	102.904	98.0573	113.889	111.29	118.803	115.258
219.707	206.252	194	210.201	166.439	204.427	201.758	218.589	229.366	202.857	221.455	202.697	201.287	213.666	203.357	204.204	202.908	203.662	203.793	248.045	262.197	235.994	239.226	235.615	241.898	244.003	257.166	254.672	247.761	246.866	251.236	241.583	251.455	268.908	281.169	282.226	284.322	297.748	284.672	306.124	294.089	297.293	283.72	272.971	189.602	181.032	125.14	123.013	162.815	207.481
53.4777	38.2102	41.6465	42.742	37.2229	35.0924	33.0255	26.1274	22.9522	35.0446	30.2261	34.172	33.5223	42.879	31.9299	47.2994	33.9745	47.3121	60.0446	56.1783	59.0796	40.8854	46.1592	60.1783	67.9459	68.0318	80.9331	86.5701	99.9586	114.529	109.742	137	134.252	143.051	166.605	165.048	190.264	200.844	186.475	189.175	193.404	198.825	212.621	220.682	189.102	189.997	208.038	218.809	224.561	215.576
79.6274	77.4299	87.9809	88.9108	92.0796	79.9618	87.3217	75.9586	82.672	87.465	100.939	103.455	107.43	94.7994	76.328	80.1497	70.914	85.9809	81.0446	85.0191	79.6274	80.0573	70.2834	78.4108	71.1815	70.6019	85.914	80.9586	78.5924	67.2643	63.1019	63.793	69.6624	77.1401	89.2484	83.8439	90.8471	90.535	93.2516	102.258	97.2357	105.946	110.146	111.169	107.745	120.57	125.64	131.713	132.608	137.029
79.0096	72.7834	73.1879	62.4172	64.5573	49.0414	56.551	64.0637	68.3885	74.3599	79.6911	80.0764	83.5223	75.1815	74.6051	71.621	98.6274	69.551	81.1815	85.1178	85.0478	92.3153	99.3121	107.847	104.127	108.838	118.908	116.64	138.694	145.213	150.382	156.322	161.111	171.166	176.382	176.334	194.15	185.869	185.433	191.611	200.857	203.93	210.471	212.943	193.72	203.178	199.045	198.016	189.879	191.041
68.1879	65.035	57.914	58.4013	54.7898	56.1338	44.4076	51.4841	56.293	61.3567	68.9745	57.0064	60.293	68.6847	75.8917	76.0446	80.9076	83.4395	87.0446	90.8185	65.2452	82.8057	90.4045	88.6752	88.1306	84.8917	80.1274	81.8917	68.3758	67.9299	75.8949	60.0955	56.828	54.9586	55.5255	43.3567	48.7834	44.242	50.0191	61.3885	63.8917	63.3312	64.5191	65.6815	64.9777	65.2484	66.2611	70.0669	69.5287	81.6242
59.9299	63.1529	61.3981	63.9427	61.9236	37.7229	51.5892	42.7866	63	65.3854	71.7771	57.5764	60.2229	42.9682	72.3057	57.8726	56.6369	60.2452	52.8153	59.2898	58.6242	61.4427	54.5924	71.449	75.6911	93.0414	139.866	102.051	105.15	86.1975	81.8694	62.6624	45.7166	63.6465	60.3185	61.3344	72.9936	63.1051	75.9713	101.554	88.1975	99.2643	85.293	77.1561	80.6433	85.7197	85.5318	100.401	112.131	96.5382
247.182	253.596	259.373	249.857	273.162	242.236	237.131	269.019	274.312	272.618	268.439	257.01	293.232	294.188	296.592	293.997	295.809	310.812	311.65	295.516	289.283	312.981	323.86	349.475	353.312	364.223	383.583	380.605	375.873	367.497	271.646	190.178	216.844	237.634	254.096	242.255	228.57	215.105	224.28	230.462	223.621	227.535	223.653	228.022	215.271	192.15	210.885	212.554	190.073	182.57
52.3535	46.0892	47.2357	39.5096	39.742	37.5605	49.6656	45.6879	45.5414	49.7006	50	50.5892	50.8344	51.4268	55.9395	56.6306	57.8631	57.6529	64.0191	71.4363	65.6401	63.2548	65.0382	72.086	71.7548	84.5605	82.2516	91.8344	86.6783	89.4268	85.7006	96.2866	88.5828	87.7325	94.9363	109.035	106.153	100.5	100.315	100.334	99.5892	99.6847	106.408	107.443	96.1178	112.611	108.882	116.513	130.303	124.532
46.9459	52.121	46.6338	53.7675	51.707	47.0701	72.7484	99.6146	84.3631	95.0127	102.385	97.5541	95.465	70.3535	57.6561	52.0637	62.5955	59.2962	51.9554	64.7866	60.4331	60.2643	61.8949	59.9936	77.914	77.0446	60.9108	93.2898	78.0191	60.3567	77.7038	87.8089	156.548	107.07	143.045	134.774	88.1242	108.287	86.1274	124.411	128.443	57.8089	74.4841	52.828	21.6815	21.449	22.1146	23.7994	26.2771	35.7611
51.8025	49.8981	42.4618	48.9745	42.9108	47.9204	48.449	58.3854	51.7548	50.3631	58.4236	58.8535	62.8535	65.5541	55.8567	57.2261	69.6943	55.207	82.6529	81.0955	94.6943	80.1943	90.0127	80.1943	78.3344	78.5924	78.8917	90.1752	86.9522	88.5127	67.7771	74.7357	78.9013	67.3981	62.4777	65.1815	72.7643	73.2803	82.2611	67.9522	86.5064	87.5478	84.2006	89.1401	78.3153	86.4076	87.7134	84.7866	84.8854	76.9745
58.0573	60.1688	53.9045	37.6115	48.328	51.9363	49.1051	50.7166	43.1561	45.2834	54.4013	47.3439	49.1401	51.5446	40.9777	49.6688	51.7357	50.2739	56.6083	58.207	51.949	54.5255	64.621	61.4172	62.2994	66.5159	74.1815	70.5605	65.2325	71.3153	75.7962	82.586	91.7102	88.5541	89.0541	94.5732	95.9618	96.086	107.755	101.704	106.347	109.312	114.299	119.904	117.503	119.573	120.232	121.723	130.032	124.392
118.618	129.659	126.363	116.506	117.08	125.226	117.889	123.978	125.831	126.484	118.901	122.067	114.162	121.28	105.822	111.656	100.382	106.188	111.22	113.439	118.618	121.755	132.309	142.315	157.911	201.876	176.204	142.736	164.869	164.939	172.952	155.153	187.213	190.815	195.602	212.605	214.207	211.611	225.666	239.803	245.981	257.994	269.596	261.666	239.79	218.72	177.678	149.086	149.328	175.006
120.443	124.844	131.688	118.908	113.64	129.516	135.14	137.631	133.933	131.497	132.252	144.535	146.675	146.5	145.99	151.761	164.439	142.844	164.427	172.287	187.01	171.818	181.099	176.048	185.487	186.866	181.828	197.43	200.226	197.506	213.869	204.175	192.051	184.825	187	179.455	173.287	164.653	155.869	156.764	151.111	150.322	108.389	132.809	104.484	105.704	89.0096	97.4427	99.2803	108.573
35.6529	34.0096	35.5987	32.9236	32.2006	39.1879	36.4682	50.1943	128.287	137.449	112.822	92.2962	71.4554	62.9809	50.0191	60.965	51.1465	54.5223	58.5764	76.0191	63.949	72.3376	98.6497	98.1178	98.2516	77.8025	76.9968	78.8471	114.035	137.685	149.102	182.984	251.331	295.994	235.274	204.866	217.895	238.258	199.691	234.678	331.981	361.197	379.242	293.277	332.455	465.032	459.503	290.758	376.264	486.885
53.5255	49.9777	43.0159	40.6178	41.8217	47.6529	58.3981	56.6752	58.4299	101.013	140.812	77.0223	88.8726	52.6911	59.1178	53.7962	56.2389	76.7389	141.704	258.067	199.159	156.389	104.783	103.28	128.605	127.771	197.108	221.65	232.567	200.57	142.427	141.376	149.561	173.726	199.933	242.162	255.121	246.943	285.564	204.675	193.086	184.041	152.452	121.723	89.8535	143.182	186.36	124.459	187.494	170.408
120.401	122.159	117.685	102.519	112.28	99.7834	96.4204	109.646	118.732	118.643	112.035	111.911	117.175	106.589	104.248	93.9013	97.3503	108.032	110.099	117.385	109.443	115.207	116.385	119.497	122.854	110.258	114.838	104.882	128.857	116.006	110.924	110.602	108.296	112.258	118.258	136.818	136.516	124.121	119.086	118.879	127.459	138.561	142.309	124.064	136.946	152.729	149.264	150.522	167.166	180.029
94.8089	80.0446	74.7038	46.2389	57.3949	51.5446	55.8185	51.8185	35.8471	58.1433	59.9331	61.7134	71.2293	64.6146	33.8248	37.1083	41.6115	59.6752	49.742	41.758	48.3153	60.2038	57.3981	56.7611	44.1688	72.9682	52.3089	53.2611	45.4236	50.6943	43.3153	53.328	28.258	37.7038	40.5414	41.6083	43.1051	32.0064	39.6561	57.0637	84.8694	80.5987	99.5669	82.8694	44.0223	44.6465	41.8121	51.2293	62.0605	53.0223
256.382	264.207	234.554	239.78	218.188	257.561	260.096	233.054	236	250.296	254.373	231.277	255.303	260.411	254.303	258.236	249.175	271.806	278.096	232.831	267.987	306.436	296.067	260.904	287.866	319.229	324.656	297.28	285.545	281.306	274.548	285.943	286.627	300.761	267.962	307.162	295.503	279.783	289.917	293.917	344.803	353.268	358.694	361.666	347.369	356.067	382.287	381.58	372.678	396.341
34.5478	29.8758	36.8217	32.1879	26.7197	29.7229	28.586	28.7484	35.9968	49.207	43.7866	48.9873	45.6306	46.0796	42.5	40.5191	60.051	60.4809	74.5096	59.6401	70.6401	89.8535	69.6529	73.7739	73.0892	75.9331	90.0318	81.1083	74.9427	99.5764	79.1943	51.9331	62.793	59.6146	76.8885	83.5924	98.879	96.1752	108.752	116.363	108.799	96.0032	87.8185	80.6783	55.3726	64.8949	52.4618	38.3217	51.8248	62.8631
61.3854	37.9076	49.551	37.9204	36.5605	40.1083	43.4968	45.328	34.4395	39.949	40.8344	44.7643	43.3726	37.2707	34.8949	40.8981	42.6115	44.5064	38.1847	45.3854	50.5987	65.3535	60.1815	58.0478	61.0446	65.2803	60.6656	70.7898	77.5382	80.3822	89.2834	103.013	85.707	109.462	116.952	81.5255	98.8981	78.672	70.6369	59.828	53.6242	53.8631	59.9968	56.535	50.793	84.0764	82.9299	44.2006	62.6146	54.1146
67.1306	67.2325	66.7675	57.2197	41.949	46.8344	45.465	47.3248	43.7325	43.258	41.8057	45.0541	41.4395	43.9427	49.5	50.0605	43.621	44.7484	43.1242	46.242	46.5	38.1688	42.9013	43.6815	41.1656	37.9013	44.5764	49.1306	56.4873	57.5	63.621	74.6338	78.2102	73.6847	73.7994	72.6401	68.4809	59.4427	60.6975	49.8408	59.172	53.2962	51.9873	60.3599	50.8057	54.2707	52.5	58.0605	61.8726	69.758
[truncated: 247 more columns]

## Sheet: Apoptosis
0	0	0	0	0	0	0	0	0	0	0	0	0	0	0	0	0	0	0	0	0	0	0	0	0	0	0	0	0	0	0	0	0	0	0	0	0	0	0	0	0	0	0	0	0	0	0	0	0	0
0	0	0	0	0	0	0	0	0	0	0	0	0	0	0	0	0	0	0	0	0	0	0	0	0	0	0	0	0	0	0	0	0	0	0	0	0	0	0	0	0	0	0	0	0	0	0	0	0	0
0	0	0	0	0	0	0	0	0	0	0	0	0	0	0	0	0	0	0	0	0	0	0	0	0	0	0	0	0	0	0	0	0	0	0	0	0	0	0	0	0	0	0	0	0	0	0	0	0	0
0	0	0	0	0	0	0	0	0	0	0	0	0	0	0	0	0	0	0	0	0	0	0	0	0	0	0	0	0	0	0	0	0	0	0	0	0	0	0	0	0	0	0	0	0	0	0	0	0	0
0	0	0	0	0	0	0	0	0	0	0	0	0	0	0	0	0	0	0	0	0	0	0	0	0	0	0	0	0	0	0	0	0	0	0	0	0	0	0	0	0	0	0	0	0	0	0	0	0	0
0	0	0	0	0	0	0	0	0	0	0	0	0	0	0	0	0	0	0	0	0	0	0	0	0	0	0	0	0	0	0	0	0	0	0	0	0	0	0	0	0	0	0	0	0	0	0	0	0	0
0	0	0	0	0	0	0	0	0	0	0	0	0	0	0	0	0	0	0	0	0	0	0	0	0	0	0	0	0	0	0	0	0	0	0	0	0	0	0	0	0	0	0	0	0	0	0	0	0	0
0	0	0	0	0	0	0	0	0	0	0	0	0	0	0	0	0	0	0	0	0	0	0	0	0	0	0	0	0	0	0	0	0	0	0	0	0	0	0	0	0	0	0	0	0	0	0	0	0	0
0	0	0	0	0	0	0	0	0	0	0	0	0	0	0	0	0	0	0	0	0	0	0	0	0	0	0	0	0	0	0	0	0	0	0	0	0	0	0	0	0	0	0	0	0	0	0	0	0	0
0	0	0	0	0	0	0	0	0	0	0	0	0	0	0	0	0	0	0	0	0	0	0	0	0	0	0	0	0	0	0	0	0	0	0	0	0	0	0	0	0	0	0	0	0	0	0	0	0	0
0	0	0	0	0	0	0	0	0	0	0	0	0	0	0	0	0	0	0	0	0	0	0	0	0	0	0	0	0	0	0	0	0	0	0	0	0	0	0	0	0	0	0	0	0	0	0	0	0	0
0	0	0	0	0	0	0	0	0	0	0	0	0	0	0	0	0	0	0	0	0	0	0	0	0	0	0	0	0	0	0	0	0	0	0	0	0	0	0	0	0	0	0	0	0	0	0	0	0	0
0	0	0	0	0	0	0	0	0	0	0	0	0	0	0	0	0	0	0	0	0	0	0	0	0	0	0	0	0	0	0	0	0	0	0	0	0	0	0	0	0	0	0	0	0	0	0	0	0	0
0	0	0	0	0	0	0	0	0	0	0	0	0	0	0	0	0	0	0	0	0	0	0	0	0	0	0	0	0	0	0	0	0	0	0	0	0	0	0	0	0	0	0	0	0	0	0	0	0	0
0	0	0	0	0	0	0	0	0	0	0	0	0	0	0	0	0	0	0	0	0	0	0	0	0	0	0	0	0	0	0	0	0	0	0	0	0	0	0	0	0	0	0	0	0	0	0	0	0	0
0	0	0	0	0	0	0	0	0	0	0	0	0	0	0	0	0	0	0	0	0	0	0	0	0	0	0	0	0	0	0	0	0	0	0	0	0	0	0	0	0	0	0	0	0	0	0	0	0	0
0	0	0	0	0	0	0	0	0	0	0	0	0	0	0	0	0	0	0	0	0	0	0	0	0	0	0	0	0	0	0	0	0	0	0	0	0	0	0	0	0	0	0	0	0	0	0	0	0	0
0	0	0	0	0	0	0	0	0	0	0	0	0	0	0	0	0	0	0	0	0	0	0	0	0	0	0	0	0	0	0	0	0	0	0	0	0	0	0	0	0	0	0	0	0	0	0	0	0	0
0	0	0	0	0	0	0	0	0	0	0	0	0	0	0	0	0	0	0	0	0	0	0	0	0	0	0	0	0	0	0	0	0	0	0	0	0	0	0	0	0	0	0	0	0	0	0	0	0	0
0	0	0	0	0	0	0	0	0	0	0	0	0	0	0	0	0	0	0	0	0	0	0	0	0	0	0	0	0	0	0	0	0	0	0	0	0	0	0	0	0	0	0	0	0	0	0	1	0	0
0	0	0	0	0	0	0	0	0	0	0	0	0	0	0	0	0	0	0	0	0	0	0	0	0	0	0	0	0	0	0	0	0	0	0	0	0	0	0	0	0	0	0	0	0	0	0	0	0	0
0	0	0	0	0	0	0	0	0	0	0	0	0	0	0	0	0	0	0	0	0	0	0	0	0	0	0	0	0	0	0	0	0	0	0	0	0	0	0	0	0	0	0	0	0	0	0	0	0	0
0	0	0	0	0	0	0	0	0	0	0	0	0	0	0	0	0	0	0	0	0	0	0	0	0	0	0	0	0	0	0	0	0	0	0	0	0	0	0	0	0	0	0	0	0	0	0	0	0	0
0	0	0	0	0	0	0	0	0	0	0	0	0	0	0	0	0	0	0	0	0	0	0	0	0	0	0	0	0	0	0	0	0	0	0	0	0	0	0	0	0	0	0	0	0	0	0	0	0	0
0	0	0	0	0	0	0	0	0	0	0	0	0	0	0	0	0	0	0	0	0	0	0	0	0	0	0	0	0	0	0	0	0	0	0	0	0	0	0	0	0	0	0	0	0	0	0	0	0	0
0	0	0	0	0	0	0	0	0	0	0	0	0	0	0	0	0	0	0	0	0	0	0	0	0	0	0	0	0	0	0	0	0	0	0	0	0	0	0	0	0	0	0	0	0	0	0	0	0	0
0	0	0	0	0	0	0	0	0	0	0	0	0	0	0	0	0	0	0	0	0	0	0	0	0	0	0	0	0	0	0	0	0	0	0	0	0	0	0	0	0	0	0	0	0	0	0	0	0	0
0	0	0	0	0	0	0	0	0	0	0	0	0	0	0	0	0	0	0	0	0	0	0	0	0	0	0	0	0	0	0	0	0	0	0	0	0	0	0	0	0	0	0	0	0	0	0	0	0	0
0	0	0	0	0	0	0	0	0	0	0	0	0	0	0	0	0	0	0	0	0	0	0	0	0	0	0	0	0	0	0	0	0	0	0	0	0	0	0	0	0	0	0	0	0	0	0	0	0	0
0	0	0	0	0	0	0	0	0	0	0	0	0	0	0	0	0	0	0	0	0	0	0	0	0	0	0	0	0	0	0	0	0	0	0	0	0	0	0	0	0	0	0	0	0	0	0	0	0	0
0	0	0	0	0	0	0	0	0	0	0	0	0	0	0	0	0	0	0	0	0	0	0	0	0	0	0	0	0	0	0	0	0	0	0	0	0	0	0	0	0	0	0	0	0	0	0	0	0	0
0	0	0	0	0	0	0	0	0	0	0	0	0	0	0	0	0	0	0	0	0	0	0	0	0	0	0	0	0	0	0	0	0	0	0	0	0	0	0	0	0	0	0	0	0	0	0	0	0	0
0	0	0	0	0	0	0	0	0	0	0	0	0	0	0	0	0	0	0	0	0	0	0	0	0	0	0	0	0	0	0	0	0	0	0	0	0	0	0	0	0	0	0	0	0	0	0	0	0	0
0	0	0	0	0	0	0	0	0	0	0	0	0	0	0	0	0	0	0	0	0	0	0	0	0	0	0	0	0	0	0	0	0	0	0	0	0	0	0	0	0	0	0	0	0	0	0	0	0	0
0	0	0	0	0	0	0	0	0	0	0	0	0	0	0	0	0	0	0	0	0	0	0	0	0	0	0	0	0	0	0	0	0	0	0	0	0	0	0	0	0	0	0	0	0	0	0	0	0	0
0	0	0	0	0	0	0	0	0	0	0	0	0	0	0	0	0	0	0	0	0	0	0	0	0	0	0	0	0	0	0	0	0	0	0	0	0	0	0	0	0	0	0	0	0	0	0	0	0	0
0	0	0	0	0	0	0	0	0	0	0	0	0	0	0	0	0	0	0	0	0	0	0	0	0	0	0	0	0	0	0	0	0	0	0	0	0	0	0	0	0	0	0	0	0	0	0	0	0	0
0	0	0	0	0	0	0	0	0	0	0	0	0	0	0	0	0	0	0	0	0	0	0	0	0	0	0	0	0	0	0	0	0	0	0	0	0	0	0	0	0	0	0	0	0	0	0	0	0	0
0	0	0	0	0	0	0	0	0	0	0	0	0	0	0	0	0	0	0	0	0	0	0	0	0	0	0	0	0	0	0	0	0	0	0	0	0	0	0	0	0	0	0	0	0	0	0	0	0	0
0	0	0	0	0	0	0	0	0	0	0	0	0	0	0	0	0	0	0	0	0	0	0	0	0	0	0	0	0	0	0	0	0	0	0	0	0	0	0	0	0	0	0	0	0	0	0	0	0	0
0	0	0	0	0	0	0	0	0	0	0	0	0	0	0	0	0	0	0	0	0	0	0	0	0	0	0	0	0	0	0	0	0	0	0	0	0	0	0	0	0	0	0	0	0	0	0	0	0	0
0	0	0	0	0	0	0	0	0	0	0	0	0	0	0	0	0	0	0	0	0	0	0	0	0	0	0	0	0	0	0	0	0	0	0	0	0	0	0	0	0	0	0	0	0	0	0	0	0	0
0	0	0	0	0	0	0	0	0	0	0	0	0	0	0	0	0	0	0	0	0	0	0	0	0	0	0	0	0	0	0	0	0	0	0	0	0	0	0	0	0	0	0	0	0	0	0	0	0	0
0	0	0	0	0	0	0	0	0	0	0	0	0	0	0	0	0	0	0	0	0	0	0	0	0	0	0	0	0	0	0	0	0	0	0	0	0	0	0	0	0	0	0	0	0	0	0	0	0	0
0	0	0	0	0	0	0	0	0	0	0	0	0	0	0	0	0	0	0	0	0	0	0	0	0	0	0	0	0	0	0	0	0	0	0	0	0	0	0	0	0	0	0	0	0	0	0	0	0	0
0	0	0	0	0	0	0	0	0	0	0	0	0	0	0	0	0	0	0	0	0	0	0	0	0	0	0	0	0	0	0	0	0	0	0	0	0	0	0	0	0	0	0	0	0	0	0	0	0	0
0	0	0	0	0	0	0	0	0	0	0	0	0	0	0	0	0	0	0	0	0	0	0	0	0	0	0	0	0	0	0	0	0	0	0	0	0	0	0	0	0	0	0	0	0	0	0	0	0	0
0	0	0	0	0	0	0	0	0	0	0	0	0	0	0	0	0	0	0	0	0	0	0	0	0	0	0	0	0	0	0	0	0	0	0	0	0	0	0	0	0	0	0	0	0	0	0	0	0	0
0	0	0	0	0	0	0	0	0	0	0	0	0	0	0	0	0	0	0	0	0	0	0	0	0	0	0	0	0	0	0	0	0	0	0	0	0	0	0	0	0	0	0	0	0	0	0	0	0	0
0	0	0	0	0	0	0	0	0	0	0	0	0	0	0	0	0	0	0	0	0	0	0	0	0	0	0	0	0	0	0	0	0	0	0	0	0	0	0	0	0	0	0	0	0	0	0	0	0	0
0	0	0	0	0	0	0	0	0	0	0	0	0	0	0	0	0	0	0	0	0	0	0	0	0	0	0	0	0	0	0	0	0	0	0	0	0	0	0	0	0	0	0	0	0	0	0	0	0	0
0	0	0	0	0	0	0	0	0	0	0	0	0	0	0	0	0	0	0	0	0	0	0	0	0	0	0	0	0	0	0	0	0	0	0	0	0	0	0	0	0	0	0	0	0	0	0	0	0	0
0	0	0	0	0	0	0	0	0	0	0	0	0	0	0	0	0	0	0	0	0	0	0	0	0	0	0	0	0	0	0	0	0	0	0	0	0	0	0	0	0	0	0	0	0	0	0	0	0	0
0	0	0	0	0	0	0	0	0	0	0	0	0	0	0	0	0	0	0	0	0	0	0	0	0	0	0	0	0	0	0	0	0	0	0	0	0	0	0	0	0	0	0	0	0	0	0	0	0	0
0	0	0	0	0	0	0	0	0	0	0	0	0	0	0	0	0	0	0	0	0	0	0	0	0	0	0	0	0	0	0	0	0	0	0	0	0	0	0	0	0	0	0	0	0	0	0	0	0	0
0	0	0	0	0	0	0	0	0	0	0	0	0	0	0	0	0	0	0	0	0	0	0	0	0	0	0	0	0	0	0	0	0	0	0	0	0	0	0	0	0	0	0	0	0	0	0	0	0	0
0	0	0	0	0	0	0	0	0	0	0	0	0	0	0	0	0	0	0	0	0	0	0	0	0	0	0	0	0	0	0	0	0	0	0	0	0	0	0	0	0	0	0	0	0	0	0	0	0	0
0	0	0	0	0	0	0	0	0	0	0	0	0	0	0	0	0	0	0	0	0	0	0	0	0	0	0	0	0	0	0	0	0	0	0	0	0	0	0	0	0	0	0	0	0	0	0	0	0	0
0	0	0	0	0	0	0	0	0	0	0	0	0	0	0	0	0	0	0	0	0	0	0	0	0	0	0	0	0	0	0	0	0	0	0	0	0	0	0	0	0	0	0	0	0	0	0	0	0	0
0	0	0	0	0	0	0	0	0	0	0	0	0	0	0	0	0	0	0	0	0	0	0	0	0	0	0	0	0	0	0	0	0	0	0	0	0	0	0	0	0	0	0	0	0	0	0	0	0	0
0	0	0	0	0	0	0	0	0	0	0	0	0	0	0	0	0	0	0	0	0	0	0	0	0	0	0	0	0	0	0	0	0	0	0	0	0	0	0	0	0	0	0	0	0	0	0	0	0	0
0	0	0	0	0	0	0	0	0	0	0	0	0	0	0	0	0	0	0	0	0	0	0	0	0	0	0	0	0	0	0	0	0	0	0	0	0	0	0	0	0	0	0	0	0	0	0	0	0	0
0	0	0	0	0	0	0	0	0	0	0	0	0	0	0	0	0	0	0	0	0	0	0	0	0	0	0	0	0	0	0	0	0	0	0	0	0	0	0	0	0	0	0	0	0	0	0	0	0	0
0	0	0	0	0	0	0	0	0	0	0	0	0	0	0	0	0	0	0	0	0	0	0	0	0	0	0	0	0	0	0	0	0	0	0	0	0	0	0	0	0	0	0	0	0	0	0	0	0	0
0	0	0	0	0	0	0	0	0	0	0	0	0	0	0	0	0	0	0	0	0	0	0	0	0	0	0	0	0	0	0	0	0	0	0	0	0	0	0	0	0	0	0	0	0	0	0	0	0	0
0	0	0	0	0	0	0	0	0	0	0	0	0	0	0	0	0	0	0	0	0	0	0	0	0	0	0	0	0	0	0	0	0	0	0	0	0	0	0	0	0	0	0	0	0	0	0	0	0	0
0	0	0	0	0	0	0	0	0	0	0	0	0	0	0	0	0	0	0	0	0	0	0	0	0	0	0	0	0	0	0	0	0	0	0	0	0	0	0	0	0	0	0	0	0	0	0	0	0	0
0	0	0	0	0	0	0	0	0	0	0	0	0	0	0	0	0	0	0	0	0	0	0	0	0	0	0	0	0	0	0	0	0	0	0	0	0	0	0	0	0	0	0	0	0	0	0	0	0	0
0	0	0	0	0	0	0	0	0	0	0	0	0	0	0	0	0	0	0	0	0	0	0	0	0	0	0	0	0	0	0	0	0	0	0	0	0	0	0	0	0	0	0	0	0	0	0	0	0	0
0	0	0	0	0	0	0	0	0	0	0	0	0	0	0	0	0	0	0	0	0	0	0	0	0	0	0	0	0	0	0	0	0	0	0	0	0	0	0	0	0	0	0	0	0	0	0	0	0	0
0	0	0	0	0	0	0	0	0	0	0	0	0	0	0	0	0	0	0	0	0	0	0	0	0	0	0	0	0	0	0	0	0	0	0	0	0	0	0	0	0	0	0	0	0	0	0	0	0	0
0	0	0	0	0	0	0	0	0	0	0	0	0	0	0	0	0	0	0	0	0	0	0	0	0	0	0	0	0	0	0	0	0	0	0	0	0	0	0	0	0	0	0	0	0	0	0	0	0	0
0	0	0	0	0	0	0	0	0	0	0	0	0	0	0	0	0	0	0	0	0	0	0	0	0	0	0	0	0	0	0	0	0	0	0	0	0	0	0	0	0	0	0	0	0	0	0	0	0	0
0	0	0	0	0	0	0	0	0	0	0	0	0	0	0	0	0	0	0	0	0	0	0	0	0	0	0	0	0	0	0	0	0	0	0	0	0	0	0	0	0	0	0	0	0	0	0	0	0	0
0	0	0	0	0	0	0	0	0	0	0	0	0	0	0	0	0	0	0	0	0	0	0	0	0	0	0	0	0	0	0	0	0	0	0	0	0	0	0	0	0	0	0	0	0	0	0	0	0	0
0	0	0	0	0	0	0	0	0	0	0	0	0	0	0	0	0	0	0	0	0	0	0	0	0	0	0	0	0	0	0	0	0	0	0	0	0	0	0	0	0	0	0	0	0	0	0	0	0	0
0	0	0	0	0	0	0	0	0	0	0	0	0	0	0	0	0	0	0	0	0	0	0	0	0	0	0	0	0	0	0	0	0	0	0	0	0	0	0	0	0	0	0	0	0	0	0	0	0	0
0	0	0	0	0	0	0	0	0	0	0	0	0	0	0	0	0	0	0	0	0	0	0	0	0	0	0	0	0	0	0	0	0	0	0	0	0	0	0	0	0	0	0	0	0	0	0	0	0	0
0	0	0	0	0	0	0	0	0	0	0	0	0	0	0	0	0	0	0	0	0	0	0	0	0	0	0	0	0	0	0	0	0	0	0	0	0	0	0	0	0	0	0	0	0	0	0	0	0	0
0	0	0	0	0	0	0	0	0	0	0	0	0	0	0	0	0	0	0	0	0	0	0	0	0	0	0	0	0	0	0	0	0	0	0	0	0	0	0	0	0	0	0	0	0	0	0	0	0	0
0	0	0	0	0	0	0	0	0	0	0	0	0	0	0	0	0	0	0	0	0	0	0	0	0	0	0	0	0	0	0	0	0	0	0	0	0	0	0	0	0	0	0	0	0	0	0	0	0	0
0	0	0	0	0	0	0	0	0	0	0	0	0	0	0	0	0	0	0	0	0	0	0	0	0	0	0	0	0	0	0	0	0	0	0	0	0	0	0	0	0	0	0	0	0	0	0	0	0	0
0	0	0	0	0	0	0	0	0	0	0	0	0	0	0	0	0	0	0	0	0	0	0	0	0	0	0	0	0	0	0	0	0	0	0	0	0	0	0	0	0	0	0	0	0	0	0	0	0	0
0	0	0	0	0	0	0	0	0	0	0	0	0	0	0	0	0	0	0	0	0	0	0	0	0	0	0	0	0	0	0	0	0	0	0	0	0	0	0	0	0	0	0	0	0	0	0	0	0	0
0	0	0	0	0	0	0	0	0	0	0	0	0	0	0	0	0	0	0	0	0	0	0	0	0	0	0	0	0	0	0	0	0	0	0	0	0	0	0	0	0	0	0	0	0	0	0	0	0	0
0	0	0	0	0	0	0	0	0	0	0	0	0	0	0	0	0	0	0	0	0	0	0	0	0	0	0	0	0	0	0	0	0	0	0	0	0	0	0	0	0	0	0	0	0	0	0	0	0	0
0	0	0	0	0	0	0	0	0	0	0	0	0	0	0	0	0	0	0	0	0	0	0	0	0	0	0	0	0	0	0	0	0	0	0	0	0	0	0	0	0	0	0	0	0	0	0	0	0	0
0	0	0	0	0	0	0	0	0	0	0	0	0	0	0	0	0	0	0	0	0	0	0	0	0	0	0	0	0	0	0	0	0	0	0	0	0	0	0	0	0	0	0	0	0	0	0	0	0	0
0	0	0	0	0	0	0	0	0	0	0	0	0	0	0	0	0	0	0	0	0	0	0	0	0	0	0	0	0	0	0	0	0	0	0	0	0	0	0	0	0	0	0	0	0	0	0	0	0	0
0	0	0	0	0	0	0	0	0	0	0	0	0	0	0	0	0	0	0	0	0	0	0	0	0	0	0	0	0	0	0	0	0	0	0	0	0	0	0	0	0	0	0	0	0	0	0	0	0	0
0	0	0	0	0	0	0	0	0	0	0	0	0	0	0	0	0	0	0	0	0	0	0	0	0	0	0	0	0	0	0	0	0	0	0	0	0	0	0	0	0	0	0	0	0	0	0	0	0	0
0	0	0	0	0	0	0	0	0	0	0	0	0	0	0	0	0	0	0	0	0	0	0	0	0	0	0	0	0	0	0	0	0	0	0	0	0	0	0	0	0	0	0	0	0	0	0	0	0	0
0	0	0	0	0	0	0	0	0	0	0	0	0	0	0	0	0	0	0	0	0	0	0	0	0	0	0	0	0	0	0	0	0	0	0	0	0	0	0	0	0	0	0	0	0	0	0	0	0	0
0	0	0	0	0	0	0	0	0	0	0	0	0	0	0	0	0	0	0	0	0	0	0	0	0	0	0	0	0	0	0	0	0	0	0	0	0	0	0	0	0	0	0	0	0	0	0	0	0	0
0	0	0	0	0	0	0	0	0	0	0	0	0	0	0	0	0	0	0	0	0	0	0	0	0	0	0	0	0	0	0	0	0	0	0	0	0	0	0	0	0	0	0	0	0	0	0	0	0	0
0	0	0	0	0	0	0	0	0	0	0	0	0	0	0	0	0	0	0	0	0	0	0	0	0	0	0	0	0	0	0	0	0	0	0	0	0	0	0	0	0	0	0	0	0	0	0	0	0	0
0	0	0	0	0	0	0	0	0	0	0	0	0	0	0	0	0	0	0	0	0	0	0	0	0	0	0	0	0	0	0	0	0	0	0	0	0	0	0	0	0	0	0	0	0	0	0	0	0	0
0	0	0	0	0	0	0	0	0	0	0	0	0	0	0	0	0	0	0	0	0	0	0	0	0	0	0	0	0	0	0	0	0	0	0	0	0	0	0	0	0	0	0	0	0	0	0	0	0	0
0	0	0	0	0	0	0	0	0	0	0	0	0	0	0	0	0	0	0	0	0	0	0	0	0	0	0	0	0	0	0	0	0	0	0	0	0	0	0	0	0	0	0	0	0	0	0	0	0	0
0	0	0	0	0	0	0	0	0	0	0	0	0	0	0	0	0	0	0	0	0	0	0	0	0	0	0	0	0	0	0	0	0	0	0	0	0	0	0	0	0	0	0	0	0	0	0	0	0	0
0	0	0	0	0	0	0	0	0	0	0	0	0	0	0	0	0	0	0	0	0	0	0	0	0	0	0	0	0	0	0	0	0	0	0	0	0	0	0	0	0	0	0	0	0	0	0	0	0	0
0	0	0	0	0	0	0	0	0	0	0	0	0	0	0	0	0	0	0	0	0	0	0	0	0	0	0	0	0	0	0	0	0	0	0	0	0	0	0	0	0	0	0	0	0	0	0	0	0	0
0	0	0	0	0	0	0	0	0	0	0	0	0	0	0	0	0	0	0	0	0	0	0	0	0	0	0	0	0	0	0	0	0	0	0	0	0	0	0	0	0	0	0	0	0	0	0	0	0	0
0	0	0	0	0	0	0	0	0	0	0	0	0	0	0	0	0	0	0	0	0	0	0	0	0	0	0	0	0	0	0	0	0	0	0	0	0	0	0	0	0	0	0	0	0	0	0	0	0	0
0	0	0	0	0	0	0	0	0	0	0	0	0	0	0	0	0	0	0	0	0	0	0	0	0	0	0	0	0	0	0	0	0	0	0	0	0	0	0	0	0	0	0	0	0	0	0	0	0	0
0	0	0	0	0	0	0	0	0	0	0	0	0	0	0	0	0	0	0	0	0	0	0	0	0	0	0	0	0	0	0	0	0	0	0	0	0	0	0	0	0	0	0	0	0	0	0	0	0	0
0	0	0	0	0	0	0	0	0	0	0	0	0	0	0	0	0	0	0	0	0	0	0	0	0	0	0	0	0	0	0	0	0	0	0	0	0	0	0	0	0	0	0	0	0	0	0	0	0	0
0	0	0	0	0	0	0	0	0	0	0	0	0	0	0	0	0	0	0	0	0	0	0	0	0	0	0	0	0	0	0	0	0	0	0	0	0	0	0	0	0	0	0	0	0	0	0	0	0	0
0	0	0	0	0	0	0	0	0	0	0	0	0	0	0	0	0	0	0	0	0	0	0	0	0	0	0	0	0	0	0	0	0	0	0	0	0	0	0	0	0	0	0	0	0	0	0	0	0	0
0	0	0	0	0	0	0	0	0	0	0	0	0	0	0	0	0	0	0	0	0	0	0	0	0	0	0	0	0	0	0	0	0	0	0	0	0	0	0	0	0	0	0	0	0	0	0	0	0	0
0	0	0	0	0	0	0	0	0	0	0	0	0	0	0	0	0	0	0	0	0	0	0	0	0	0	0	0	0	0	0	0	0	0	0	0	0	0	0	0	0	0	0	0	0	0	0	0	0	0
0	0	0	0	0	0	0	0	0	0	0	0	0	0	0	0	0	0	0	0	0	0	0	0	0	0	0	0	0	0	0	0	0	0	0	0	0	0	0	0	0	0	0	0	0	0	0	0	0	0
0	0	0	0	0	0	0	0	0	0	0	0	0	0	0	0	0	0	0	0	0	0	0	0	0	0	0	0	0	0	0	0	0	0	0	0	0	0	0	0	0	0	0	0	0	0	0	0	0	0
0	0	0	0	0	0	0	0	0	0	0	0	0	0	0	0	0	0	0	0	0	0	0	0	0	0	0	0	0	0	0	0	0	0	0	0	0	0	0	0	0	0	0	0	0	0	0	0	0	0
0	0	0	0	0	0	0	0	0	0	0	0	0	0	0	0	0	0	0	0	0	0	0	0	0	0	0	0	0	0	0	0	0	0	0	0	0	0	0	0	0	0	0	0	0	0	0	0	0	0
0	0	0	0	0	0	0	0	0	0	0	0	0	0	0	0	0	0	0	0	0	0	0	0	0	0	0	0	0	0	0	0	0	0	0	0	0	0	0	0	0	0	0	0	0	0	0	0	0	0
0	0	0	0	0	0	0	0	0	0	0	0	0	0	0	0	0	0	0	0	0	0	0	0	0	0	0	0	0	0	0	0	0	0	0	0	0	0	0	0	0	0	0	0	0	0	0	0	0	0
0	0	0	0	0	0	0	0	0	0	0	0	0	0	0	0	0	0	0	0	0	0	0	0	0	0	0	0	0	0	0	0	0	0	0	0	0	0	0	0	0	0	0	0	0	0	0	0	0	0
0	0	0	0	0	0	0	0	0	0	0	0	0	0	0	0	0	0	0	0	0	0	0	0	0	0	0	0	0	0	0	0	0	0	0	0	0	0	0	0	0	0	0	0	0	0	0	0	0	0
0	0	0	0	0	0	0	0	0	0	0	0	0	0	0	0	0	0	0	0	0	0	0	0	0	0	0	0	0	0	0	0	0	0	0	0	0	0	0	0	0	0	0	0	0	0	0	0	0	0
0	0	0	0	0	0	0	0	0	0	0	0	0	0	0	0	0	0	0	0	0	0	0	0	0	0	0	0	0	0	0	0	0	0	0	0	0	0	0	0	0	0	0	0	0	0	0	0	0	0
0	0	0	0	0	0	0	0	0	0	0	0	0	0	0	0	0	0	0	0	0	0	0	0	0	0	0	0	0	0	0	0	0	0	0	0	0	0	0	0	0	0	0	0	0	0	0	0	0	0
0	0	0	0	0	0	0	0	0	0	0	0	0	0	0	0	0	0	0	0	0	0	0	0	0	0	0	0	0	0	0	0	0	0	0	0	0	0	0	0	0	0	0	0	0	0	0	0	0	0
0	0	0	0	0	0	0	0	0	0	0	0	0	0	0	0	0	0	0	0	0	0	0	0	0	0	0	0	0	0	0	0	0	0	0	0	0	0	0	0	0	0	0	0	0	0	0	0	0	0
0	0	0	0	0	0	0	0	0	0	0	0	0	0	0	0	0	0	0	0	0	0	0	0	0	0	0	0	0	0	0	0	0	0	0	0	0	0	0	0	0	0	0	0	0	0	0	0	0	0
0	0	0	0	0	0	0	0	0	0	0	0	0	0	0	0	0	0	0	0	0	0	0	0	0	0	0	0	0	0	0	0	0	0	0	0	0	0	0	0	0	0	0	0	0	0	0	0	0	0
0	0	0	0	0	0	0	0	0	0	0	0	0	0	0	0	0	0	0	0	0	0	0	0	0	0	0	0	0	0	0	0	0	0	0	0	0	0	0	0	0	0	0	0	0	0	0	0	0	0
0	0	0	0	0	0	0	0	0	0	0	0	0	0	0	0	0	0	0	0	0	0	0	0	0	0	0	0	0	0	0	0	0	0	0	0	0	0	0	0	0	0	0	0	0	0	0	0	0	0
0	0	0	0	0	0	0	0	0	0	0	0	0	0	0	0	0	0	0	0	0	0	0	0	0	0	0	0	0	0	0	0	0	0	0	0	0	0	0	0	0	0	0	0	0	0	0	0	0	0
0	0	0	0	0	0	0	0	0	0	0	0	0	0	0	0	0	0	0	0	0	0	0	0	0	0	0	0	0	0	0	0	0	0	0	0	0	0	0	0	0	0	0	0	0	0	0	0	0	0
0	0	0	0	0	0	0	0	0	0	0	0	0	0	0	0	0	0	0	0	0	0	0	0	0	0	0	0	0	0	0	0	0	0	0	0	0	0	0	0	0	0	0	0	0	0	0	0	0	0
0	0	0	0	0	0	0	0	0	0	0	0	0	0	0	0	0	0	0	0	0	0	0	0	0	0	0	0	0	0	0	0	0	0	0	0	0	0	0	0	0	0	0	0	0	0	0	0	0	0
0	0	0	0	0	0	0	0	0	0	0	0	0	0	0	0	0	0	0	0	0	0	0	0	0	0	0	0	0	0	0	0	0	0	0	0	0	0	0	0	0	0	0	0	0	0	0	0	0	0
0	0	0	0	0	0	0	0	0	0	0	0	0	0	0	0	0	0	0	0	0	0	0	0	0	0	0	0	0	0	0	0	0	0	0	0	0	0	0	0	0	0	0	0	0	0	0	0	0	0
0	0	0	0	0	0	0	0	0	0	0	0	0	0	0	0	0	0	0	0	0	0	0	0	0	0	0	0	0	0	0	0	0	0	0	0	0	0	0	0	0	0	0	0	0	0	0	0	0	0
0	0	0	0	0	0	0	0	0	0	0	0	0	0	0	0	0	0	0	0	0	0	0	0	0	0	0	0	0	0	0	0	0	0	0	0	0	0	0	0	0	0	0	0	0	0	0	0	0	0
0	0	0	0	0	0	0	0	0	0	0	0	0	0	0	0	0	0	0	0	0	0	0	0	0	0	0	0	0	0	0	0	0	0	0	0	0	0	0	0	0	0	0	0	0	0	0	0	0	0
0	0	0	0	0	0	0	0	0	0	0	0	0	0	0	0	0	0	0	0	0	0	0	0	0	0	0	0	0	0	0	0	0	0	0	0	0	0	0	0	0	0	0	0	0	0	0	0	0	0
0	0	0	0	0	0	0	0	0	0	0	0	0	0	0	0	0	0	0	0	0	0	0	0	0	0	0	0	0	0	0	0	0	0	0	0	0	0	0	0	0	0	0	0	0	0	0	0	0	0
0	0	0	0	0	0	0	0	0	0	0	0	0	0	0	0	0	0	0	0	0	0	0	0	0	0	0	0	0	0	0	0	0	0	0	0	0	0	0	0	0	0	0	0	0	0	0	0	0	0
0	0	0	0	0	0	0	0	0	0	0	0	0	0	0	0	0	0	0	0	0	0	0	0	0	0	0	0	0	0	0	0	0	0	0	0	0	0	0	0	0	0	0	0	0	0	0	0	0	0
0	0	0	0	0	0	0	0	0	0	0	0	0	0	0	0	0	0	0	0	0	0	0	0	0	0	0	0	0	0	0	0	0	0	0	0	0	0	0	0	0	0	0	0	0	0	0	0	0	0
0	0	0	0	0	0	0	0	0	0	0	0	0	0	0	0	0	0	0	0	0	0	0	0	0	0	0	0	0	0	0	0	0	0	0	0	0	0	0	0	0	0	0	0	0	0	0	0	0	0
0	0	0	0	0	0	0	0	0	0	0	0	0	0	0	0	0	0	0	0	0	0	0	0	0	0	0	0	0	0	0	0	0	0	0	0	0	0	0	0	0	0	0	0	0	0	0	0	0	0
0	0	0	0	0	0	0	0	0	0	0	0	0	0	0	0	0	0	0	0	0	0	0	0	0	0	0	0	0	0	0	0	0	0	0	0	0	0	0	0	0	0	0	0	0	0	0	0	0	0
0	0	0	0	0	0	0	0	0	0	0	0	0	0	0	0	0	0	0	0	0	0	0	0	0	0	0	0	0	0	0	0	0	0	0	0	0	0	0	0	0	0	0	0	0	0	0	0	0	0
0	0	0	0	0	0	0	0	0	0	0	0	0	0	0	0	0	0	0	0	0	0	0	0	0	0	0	0	0	0	0	0	0	0	0	0	0	0	0	0	0	0	0	0	0	0	0	0	0	0
0	0	0	0	0	0	0	0	0	0	0	0	0	0	0	0	0	0	0	0	0	0	0	0	0	0	0	0	0	0	0	0	0	0	0	0	0	0	0	0	0	0	0	0	0	0	0	0	0	0
0	0	0	0	0	0	0	0	0	0	0	0	0	0	0	0	0	0	0	0	0	0	0	0	0	0	0	0	0	0	0	0	0	0	0	0	0	0	0	0	0	0	0	0	0	0	0	0	0	0
0	0	0	0	0	0	0	0	0	0	0	0	0	0	0	0	0	0	0	0	0	0	0	0	0	0	0	0	0	0	0	0	0	0	0	0	0	0	0	0	0	0	0	0	0	0	0	0	0	0
0	0	0	0	0	0	0	0	0	0	0	0	0	0	0	0	0	0	0	0	0	0	0	0	0	0	0	0	0	0	0	0	0	0	0	0	0	0	0	0	0	0	0	0	0	0	0	0	0	0
0	0	0	0	0	0	0	0	0	0	0	0	0	0	0	0	0	0	0	0	0	0	0	0	0	0	0	0	0	0	0	0	0	0	0	0	0	0	0	0	0	0	0	0	0	0	0	0	0	0
0	0	0	0	0	0	0	0	0	0	0	0	0	0	0	0	0	0	0	0	0	0	0	0	0	0	0	0	0	0	0	0	0	0	0	0	0	0	0	0	0	0	0	0	0	0	0	0	0	0
0	0	0	0	0	0	0	0	0	0	0	0	0	0	0	0	0	0	0	0	0	0	0	0	0	0	0	0	0	0	0	0	0	0	0	0	0	0	0	0	0	0	0	0	0	0	0	0	0	0
0	0	0	0	0	0	0	0	0	0	0	0	0	0	0	0	0	0	0	0	0	0	0	0	0	0	0	0	0	0	0	0	0	0	0	0	0	0	0	0	0	0	0	0	0	0	0	0	0	0
0	0	0	0	0	0	0	0	0	0	0	0	0	0	0	0	0	0	0	0	0	0	0	0	0	0	0	0	0	0	0	0	0	0	0	0	0	0	0	0	0	0	0	0	0	0	0	0	0	0
0	0	0	0	0	0	0	0	0	0	0	0	0	0	0	0	0	0	0	0	0	0	0	0	0	0	0	0	0	0	0	0	0	0	0	0	0	0	0	0	0	0	0	0	0	0	0	0	0	0
0	0	0	0	0	0	0	0	0	0	0	0	0	0	0	0	0	0	0	0	0	0	0	0	0	0	0	0	0	0	0	0	0	0	0	0	0	0	0	0	0	0	0	0	0	0	0	0	0	0
0	0	0	0	0	0	0	0	0	0	0	0	0	0	0	0	0	0	0	0	0	0	0	0	0	0	0	0	0	0	0	0	0	0	0	0	0	0	0	0	0	0	0	0	0	0	0	0	0	0
0	0	0	0	0	0	0	0	0	0	0	0	0	0	0	0	0	0	0	0	0	0	0	0	0	0	0	0	0	0	0	0	0	0	0	0	0	0	0	0	0	0	0	0	0	0	0	0	0	0
0	0	0	0	0	0	0	0	0	0	0	0	0	0	0	0	0	0	0	0	0	0	0	0	0	0	0	0	0	0	0	0	0	0	0	0	0	0	0	0	0	0	0	0	0	0	0	0	0	0
0	0	0	0	0	0	0	0	0	0	0	0	0	0	0	0	0	0	0	0	0	0	0	0	0	0	0	0	0	0	0	0	0	0	0	0	0	0	0	0	0	0	0	0	0	0	0	0	0	0
0	0	0	0	0	0	0	0	0	0	0	0	0	0	0	0	0	0	0	0	0	0	0	0	0	0	0	0	0	0	0	0	0	0	0	0	0	0	0	0	0	0	0	0	0	0	0	0	0	0
0	0	0	0	0	0	0	0	0	0	0	0	0	0	0	0	0	0	0	0	0	0	0	0	0	0	0	0	0	0	0	0	0	0	0	0	0	0	0	0	0	0	0	0	0	0	0	0	0	0
0	0	0	0	0	0	0	0	0	0	0	0	0	0	0	0	0	0	0	0	0	0	0	0	0	0	0	0	0	0	0	0	0	0	0	0	0	0	0	0	0	0	0	0	0	0	0	0	0	0
0	0	0	0	0	0	0	0	0	0	0	0	0	0	0	0	0	0	0	0	0	0	0	0	0	0	0	0	0	0	0	0	0	0	0	0	0	0	0	0	0	0	0	0	0	0	0	0	0	0
0	0	0	0	0	0	0	0	0	0	0	0	0	0	0	0	0	0	0	0	0	0	0	0	0	0	0	0	0	0	0	0	0	0	0	0	0	0	0	0	0	0	0	0	0	0	0	0	0	0
0	0	0	0	0	0	0	0	0	0	0	0	0	0	0	0	0	0	0	0	0	0	0	0	0	0	0	0	0	0	0	0	0	0	0	0	0	0	0	0	0	0	0	0	0	0	0	0	0	0
0	0	0	0	0	0	0	0	0	0	0	0	0	0	0	0	0	0	0	0	0	0	0	0	0	0	0	0	0	0	0	0	0	0	0	0	0	0	0	0	0	0	0	0	0	0	0	0	0	0
0	0	0	0	0	0	0	0	0	0	0	0	0	0	0	0	0	0	0	0	0	0	0	0	0	0	0	0	0	0	0	0	0	0	0	0	0	0	0	0	0	0	0	0	0	0	0	0	0	0
0	0	0	0	0	0	0	0	0	0	0	0	0	0	0	0	0	0	0	0	0	0	0	0	0	0	0	0	0	0	0	0	0	0	0	0	0	0	0	0	0	0	0	0	0	0	0	0	0	0
0	0	0	0	0	0	0	0	0	0	0	0	0	0	0	0	0	0	0	0	0	0	0	0	0	0	0	0	0	0	0	0	0	0	0	0	0	0	0	0	0	0	0	0	0	0	0	0	0	0
0	0	0	0	0	0	0	0	0	0	0	0	0	0	0	0	0	0	0	0	0	0	0	0	0	0	0	0	0	0	0	0	0	0	0	0	0	0	0	0	0	0	0	0	0	0	0	0	0	0
0	0	0	0	0	0	0	0	0	0	0	0	0	0	0	0	0	0	0	0	0	0	0	0	0	0	0	0	0	0	0	0	0	0	0	0	0	0	0	0	0	0	0	0	0	0	0	0	0	0
0	0	0	0	0	0	0	0	0	0	0	0	0	0	0	0	0	0	0	0	0	0	0	0	0	0	0	0	0	0	0	0	0	0	0	0	0	0	0	0	0	0	0	0	0	0	0	0	0	0
0	0	0	0	0	0	0	0	0	0	0	0	0	0	0	0	0	0	0	0	0	0	0	0	0	0	0	0	0	0	0	0	0	0	0	0	0	0	0	0	0	0	0	0	0	0	0	0	0	0
0	0	0	0	0	0	0	0	0	0	0	0	0	0	0	0	0	0	0	0	0	0	0	0	0	0	0	0	0	0	0	0	0	0	0	0	0	0	0	0	0	0	0	0	0	0	0	0	0	0
0	0	0	0	0	0	0	0	0	0	0	0	0	0	0	0	0	0	0	0	0	0	0	0	0	0	0	0	0	0	0	0	0	0	0	0	0	0	0	0	0	0	0	0	0	0	0	0	0	0
0	0	0	0	0	0	0	0	0	0	0	0	0	0	0	0	0	0	0	0	0	0	0	0	0	0	0	0	0	0	0	0	0	0	0	0	0	0	0	0	0	0	0	0	0	0	0	0	0	0
0	0	0	0	0	0	0	0	0	0	0	0	0	0	0	0	0	0	0	0	0	0	0	0	0	0	0	0	0	0	0	0	0	0	0	0	0	0	0	0	0	0	0	0	0	0	0	0	0	0
0	0	0	0	0	0	0	0	0	0	0	0	0	0	0	0	0	0	0	0	0	0	0	0	0	0	0	0	0	0	0	0	0	0	0	0	0	0	0	0	0	0	0	0	0	0	0	0	0	0
0	0	0	0	0	0	0	0	0	0	0	0	0	0	0	0	0	0	0	0	0	0	0	0	0	0	0	0	0	0	0	0	0	0	0	0	0	0	0	0	0	0	0	0	0	0	0	0	0	0
0	0	0	0	0	0	0	0	0	0	0	0	0	0	0	0	0	0	0	0	0	0	0	0	0	0	0	0	0	0	0	0	0	0	0	0	0	0	0	0	0	0	0	0	0	0	0	0	0	0
0	0	0	0	0	0	0	0	0	0	0	0	0	0	0	0	0	0	0	0	0	0	0	0	0	0	0	0	0	0	0	0	0	0	0	0	0	0	0	0	0	0	0	0	0	0	0	0	0	0
0	0	0	0	0	0	0	0	0	0	0	0	0	0	0	0	0	0	0	0	0	0	0	0	0	0	0	0	0	0	0	0	0	0	0	0	0	0	0	0	0	0	0	0	0	0	0	0	0	0
0	0	0	0	0	0	0	0	0	0	0	0	0	0	0	0	0	0	0	0	0	0	0	0	0	0	0	0	0	0	0	0	0	0	0	0	0	0	0	0	0	0	0	0	0	0	0	0	0	0
0	0	0	0	0	0	0	0	0	0	0	0	0	0	0	0	0	0	0	0	0	0	0	0	0	0	0	0	0	0	0	0	0	0	0	0	0	0	0	0	0	0	0	0	0	0	0	0	0	0
0	0	0	0	0	0	0	0	0	0	0	0	0	0	0	0	0	0	0	0	0	0	0	0	0	0	0	0	0	0	0	0	0	0	0	0	0	0	0	0	0	0	0	0	0	0	0	0	0	0
0	0	0	0	0	0	0	0	0	0	0	0	0	0	0	0	0	0	0	0	0	0	0	0	0	0	0	0	0	0	0	0	0	0	0	0	0	0	0	0	0	0	0	0	0	0	0	0	0	0
0	0	0	0	0	0	0	0	0	0	0	0	0	0	0	0	0	0	0	0	0	0	0	0	0	0	0	0	0	0	0	0	0	0	0	0	0	0	0	0	0	0	0	0	0	0	0	0	0	0
0	0	0	0	0	0	0	0	0	0	0	0	0	0	0	0	0	0	0	0	0	0	0	0	0	0	0	0	0	0	0	0	0	0	0	0	0	0	0	0	0	0	0	0	0	0	0	0	0	0
0	0	0	0	0	0	0	0	0	0	0	0	0	0	0	0	0	0	0	0	0	0	0	0	0	0	0	0	0	0	0	0	0	0	0	0	0	0	0	0	0	0	0	0	0	0	0	0	0	0
[truncated: 247 more columns]
